# Supplementary material for: Supercritical water assisted preparation of recyclable gold nanoparticles and their catalytic utility in cross-coupling reactions under sustainable conditions
Source: Royal Society of Chemistry journal article supplement (doi:10.1039/c9na00240e), 2019-01-01
Supplement: c9na00240e1.pdf [file c9na00240e1.pdf]

## Supplementary Data

### Super critical water assisted preparation of recyclable gold nanoparticles and their catalytic utility in cross-coupling reactions under sustainable conditions

Abbasriyaludeen Abdul Raheem,<sup>†a,b</sup> Pitchai Thangasamy,<sup>†a,b</sup> Marappan Sathish\*<sup>a,b</sup> and Chandrasekar Praveen\*<sup>a,b</sup>

<sup>a</sup>Materials Electrochemistry Division, Central Electrochemical Research Institute (CSIR laboratory), Karaikudi-630003, Tamil Nadu, India.

<sup>b</sup>Academy of Scientific and Innovative Research (AcSIR), Ghaziabad-201002, Uttar Pradesh, India

Email: [msathish@cecri.res.in](mailto:msathish@cecri.res.in), [chandrasekar.praveen@gmail.com](mailto:chandrasekar.praveen@gmail.com)

<sup>†</sup>Both authors contributed equally to this work

| Table of contents                                                                                                  | Page |
|--------------------------------------------------------------------------------------------------------------------|------|
| I. General methods                                                                                                 | S2   |
| II. Experimental                                                                                                   | S4   |
| III. <sup>1</sup> H NMR & <sup>13</sup> C NMR of <b>3g</b> , <b>5f</b> , <b>5g</b> , <b>3h-3k</b> and <b>6a-6d</b> | S11  |
| IV. UV-vis spectra of <b>6a-6d</b> as thin film                                                                    | S33  |
| V. UV-vis spectra of <b>6a-6d</b> in different solvents                                                            | S34  |
| VI. Photoluminescence spectra of <b>6a-6d</b>                                                                      | S35  |
| VII. Energy band diagram of <b>6a-6d</b>                                                                           | S37  |

## I. General methods

### Materials, methods and instruments

The formation of AuNPs from  $\text{HAuCl}_4 \cdot 3\text{H}_2\text{O}$  by SCF processing was confirmed using Powder X-ray diffraction (PXRD) analysis, which was recorded in the BRUKER D8 ADVANCE X-ray Diffractometer with  $\text{Cu K}\alpha$  radiation ( $\alpha = 1.5418 \text{ \AA}$ ) from  $2\theta = 10$  to  $80^\circ$  in steps of  $0.02^\circ$  and a count time of 0.2s. UV-visible absorption spectra were measured using VARIAN (Cary 500 Scan) UV-vis-NIR spectrophotometer system. The surface morphology of SCF assisted synthesis of AuNPs was characterized by field emission scanning electron microscopy (FE-SEM) and High Resolution Transmission Electron Microscopy (HR-TEM) analysis. SEM and HR-TEM images were captured at different locations of the AuNPs coated substrate using Carl Zeiss AG, Supra 55VP with an accelerating voltage of 0.1–30 kV and Tecnai G2 F20 S-Twin working at an accelerating voltage of 200 kV, respectively. The formation of AuNPs was further confirmed by X-ray photoelectron spectroscopy (XPS) analysis using Thermo Scientific MULTILAB 2000 base system with X-ray, Auger and ISS attachments using  $\text{Mg K}\alpha$  (1253.6 eV) as X-ray source. All reactions were carried out in ultra clean glass vials and stir bars. Analytical TLC was performed on precoated plastic sheets of silica gel G/UV-254 of 0.2 mm thickness (Macherey-Nagel, Germany) using analytical grade solvents and visualized with iodine spray (10% w/w  $\text{I}_2$  in silica gel), UV light ( $\lambda = 254$  and  $365 \text{ nm}$ ) and alkaline  $\text{KMnO}_4$  solution. Column chromatography was performed using thick-walled glass columns along with a mixture of petroleum ether and ethyl acetate on silica gel (100-200 mesh, SRL, India). The relative proportions of solvents in chromatography solvent mixtures refer to the volume to volume ratio. FT-IR spectra were recorded on a Bruker TENSOR 27 spectrometer in the frequency range from  $400$  to  $4000 \text{ cm}^{-1}$  using KBr pellet technique.  $^1\text{H}$  and  $^{13}\text{C}$  NMR spectra were obtained in and  $\text{CDCl}_3$  on a BRUKER spectrometer

at 400 and 100 MHz respectively. Proton chemical shifts ( $\delta$ ) are relative to tetramethylsilane (TMS,  $\delta = 0.00$ ) as internal standard and expressed in parts per million (ppm). The number of protons ( $n$ ) for a given resonance was indicated as  $nH$ . Spin multiplicities are given as s (singlet), d (doublet), t (triplet) and m (multiplet). Coupling constants ( $J$ ) are given in hertz (Hz). High resolution mass spectra (HRMS) were obtained using a Q-TOF and JEOL-GCMate II mass spectrometer. GC-MS spectra were obtained using a PerkinElmer instrument. ICP measurements were done using Agilent technologies 5110-ICP-OES equipped with auto sampler capacity of 240 tubes. UV-visible spectra for all solution and the thin film phase were recorded in chloroform solution and a thin film on a SHIMADZU UV-3600 plus UV-VIS-NIR spectrometer. Photoluminescence spectra were recorded on a Jasco spectrofluorometer FP-8500. Cyclic voltammetry (CV) experiments were performed with an Autolab potentiostat galvanostat (Model PGSTAT-30). All CV measurements were carried out at room temperature with a conventional three-electrode configuration employing a glassy carbon electrode as the working electrode, silver wire as the pseudo-reference electrode and a Pt wire as the counter electrode. Tetrabutylammonium perchlorate (0.1 M) as the supporting electrolyte was used in argon-purged acetonitrile at a scan rate  $50 \text{ mV s}^{-1}$ . A thermal evaporator with a sputtering unit (model no.: VRSU04D) and thickness monitor (model no.: CTM-200) was used for chemical vapour deposition. The OPV device performance was measured by recording the current voltage characteristics using a potentiostat (Keithley 2400) under illumination from a Solar Simulator (Science-Tech) with an AM 1.5G filter set and an illumination intensity of  $100 \text{ mW cm}^{-2}$ .

## II. Experimental

### Typical experimental procedure for Suzuki / Sonogashira / Heck coupling and catalyst recycling

In a screw cap vial containing 5 mL of demineralized water/EtOH (1:1 v/v) were added aryl halide (0.01 mol, 1.0 eq), arylboronic acid (0.01 mol, 1.0 eq) or terminal alkyne (0.01 mol, 1.0 eq) or styrene (0.01 mol, 1.0 eq), K<sub>2</sub>CO<sub>3</sub> (0.02 mol, 2.0 eq) and AuNPs (0.1 mol%). The vial was capped and heated at reflux for 1 h, after which the solvents were distilled-off at reduced pressure. To the resulting crude mixture was added 5 mL of EtOH, centrifuged at 1000 rpm and filtered on a membrane filter (0.2 μM) to remove AuNPs. Further washing with portions of EtOH, pure water and acetone in a sequential manner affords the recycled AuNPs. The filtrate which contains crude product was distilled-off and traces of starting materials were removed by a short pad of silica gel flash chromatography using EtOAc/cyclohexane to obtain the pure product.

#### Biphenyl (3a)<sup>1</sup>

White solid; <sup>1</sup>H NMR (400 MHz, CDCl<sub>3</sub>, δ in ppm): 7.32 (t, 2H, *J* = 8.0 Hz), 7.39 (t, 4H, *J* = 8.0 Hz), 7.58 (d, 4H, *J* = 8.0 Hz); <sup>13</sup>C NMR (100 MHz, CDCl<sub>3</sub>, δ in ppm): 127.3, 127.4, 128.9, 141.3.

#### 4-Methyl biphenyl (3b)<sup>1</sup>

White solid; <sup>1</sup>H NMR (400 MHz, CDCl<sub>3</sub>, δ in ppm): 2.38 (s, 3 H), 7.24 (d, 2 H, *J* = 8.0 Hz), 7.32 (d, 1 H, *J* = 8.0 Hz), 7.42 (t, 2 H, *J* = 8.0 Hz), 7.48 (d, 2 H, *J* = 8.0 Hz), 7.57 (d, 2 H, *J* = 8.0 Hz); <sup>13</sup>C NMR (100 MHz, CDCl<sub>3</sub>, δ in ppm): 21.2, 127.0, 127.1, 128.8, 129.5, 129.6, 137.1, 138.4, 141.2.

#### 4-Acetylbiphenyl (3c)<sup>2</sup>

White solid; <sup>1</sup>H NMR (400 MHz, CDCl<sub>3</sub>, δ in ppm): 2.63 (s, 3H), 7.39 (t, 1H, *J* = 8.0 Hz), 7.46 (t, 2H, *J* = 8.0 Hz), 7.62 (d, 2H, *J* = 8.0 Hz), 7.67 (d, 2H, *J* = 8.0 Hz), 8.02 (d, 2H, *J* = 8.0 Hz); <sup>13</sup>C

NMR (100 MHz, CDCl<sub>3</sub>,  $\delta$  in ppm): 26.6, 127.2, 127.3, 128.2, 128.9, 129.0, 135.9, 139.9, 145.8, 197.7.

**2-Methoxyl biphenyl (3d)**<sup>3</sup>

Colourless liquid; <sup>1</sup>H NMR (400 MHz, CDCl<sub>3</sub>,  $\delta$  in ppm): 3.79 (s, 3H), 7.02-6.96 (m, 2H), 7.33-7.29 (m, 3H), 7.40 (t, 2H,  $J = 8.0$  Hz), 7.52 (d, 2H,  $J = 8.0$  Hz); <sup>13</sup>C NMR (100 MHz, CDCl<sub>3</sub>,  $\delta$  in ppm): 55.6, 111.3, 120.9, 127.0, 128.0, 128.7, 129.6, 130.8, 130.9, 138.6, 156.5.

**4-Methoxyl biphenyl (3e)**<sup>1</sup>

White solid; <sup>1</sup>H NMR (400 MHz, CDCl<sub>3</sub>,  $\delta$  in ppm): 3.83 (s, 3H), 6.97 (d, 2H,  $J = 8.0$  Hz), 7.30 (d, 1H,  $J = 8.0$  Hz), 7.40 (t, 2H,  $J = 8.0$  Hz), 7.53 (t, 4H,  $J = 8.0$  Hz); <sup>13</sup>C NMR (100 MHz, CDCl<sub>3</sub>,  $\delta$  in ppm): 55.4, 114.2, 126.7, 126.8, 128.2, 128.8, 133.8, 140.9, 159.2.

**4-Fluorobiphenyl (3f)**<sup>4</sup>

White solid; <sup>1</sup>H NMR (400 MHz, CDCl<sub>3</sub>,  $\delta$  in ppm): 7.12-7.06 (m, 2H), 7.31 (t, 1H), 7.40 (t, 2H,  $J = 8.0$  Hz), 7.53-7.49 (m, 4H); <sup>13</sup>C NMR (100 MHz, CDCl<sub>3</sub>,  $\delta$  in ppm): 115.6, 127.1, 127.3, 128.8, 137.4, 140.3, 161.4, 163.8.

**Diphenylacetylene (5a)**<sup>5</sup>

<sup>1</sup>H NMR (400 MHz, CDCl<sub>3</sub>,  $\delta$  in ppm): 7.35-7.29 (m, 6H), 7.58-7.53 (m, 4H); <sup>13</sup>C NMR (100 MHz, CDCl<sub>3</sub>,  $\delta$  in ppm): 89.5, 123.2, 128.2, 128.5, 131.7.

**(4-Methoxyphenyl)phenylacetylene (5b)**<sup>6</sup>

<sup>1</sup>H NMR (400 MHz, CDCl<sub>3</sub>,  $\delta$  in ppm): 3.83 (s, 3H), 6.89 (d, 2H,  $J = 8.0$  Hz), 7.38-7.32 (m, 3H), 7.54-7.44 (m, 4H), <sup>13</sup>C NMR (100 MHz, CDCl<sub>3</sub>,  $\delta$  in ppm): 55.4, 88.1, 89.2, 113.9, 115.4, 123.4, 127.9, 128.4, 133.1, 131.4, 159.6,

**(4-Nitrophenyl)phenylacetylene (5c)**<sup>7</sup>

<sup>1</sup>H NMR (400 MHz, CDCl<sub>3</sub>, δ in ppm): 7.39-7.35 (m, 3H), 7.58-7.54 (m, 2H), 7.66 (d, 2H, *J* = 8.0 Hz), 8.21 (d, 2H, *J* = 8.0 Hz); <sup>13</sup>C NMR (100 MHz, CDCl<sub>3</sub>, δ in ppm): 87.7, 94.8, 122.0, 123.7, 128.6, 129.3, 130.1, 131.9, 132.1, 146.9.

**Phenyl-*p*-tolylacetylene (5d)**<sup>8</sup>

<sup>1</sup>H NMR (400 MHz, CDCl<sub>3</sub>, δ in ppm): 2.31 (s, 3H), 7.15 (d, 2H, *J* = 8.0 Hz), 7.28-7.22 (m, 3H), 7.44 (d, 2H, *J* = 8.0 Hz), 7.50-7.45 (m, 2H); <sup>13</sup>C NMR (100 MHz, CDCl<sub>3</sub>, δ in ppm): 21.5, 88.5, 89.8, 120.0, 123.5, 128.0, 128.1, 129.0, 131.6, 138.2.

**(4-Cyanophenyl)phenylacetylene (5e)**<sup>9</sup>

<sup>1</sup>H NMR (400 MHz, CDCl<sub>3</sub>, δ in ppm): 7.44-7.40 (m, 3H), 7.58-7.55 (m, 2H), 7.68-7.61 (m, 4H); <sup>13</sup>C NMR (100 MHz, CDCl<sub>3</sub>, δ in ppm): 87.7, 93.7, 111.4, 118.5, 122.2, 128.2, 128.5, 129.1, 131.8, 132.0.

**(*E*)-1,2-Diphenylethene (5a')**<sup>10</sup>

<sup>1</sup>H NMR (400 MHz, CDCl<sub>3</sub>, δ in ppm): 7.15 (s, 2H), 7.27-7.31 (t, 2H, *J* = 7.6 Hz); 7.35-7.43 (t, 4H, *J* = 7.6 Hz), 7.57 (d, 4H, *J* = 6.9 Hz); <sup>13</sup>C NMR (100 MHz, CDCl<sub>3</sub>, δ in ppm): 126.5, 127.6, 128.7, 137.4.

**4'-(Diphenylamino)-[1,1'-biphenyl]-4-carbaldehyde (3h)**

Bright green solid; Mp: 74.2-77.0 °C; R<sub>f</sub> = 0.23 (5% EA / PE); FT-IR (KBr): 3032, 2924, 2854, 1703, 1594, 1491, 1328, 1282, 1182, 1086, 965, 822, 756, 697 cm<sup>-1</sup>; <sup>1</sup>H NMR (400 MHz, CDCl<sub>3</sub>, δ in ppm): 7.10 (t, 2H, *J* = 8.0 Hz), 7.14 – 7.19 (m, 6H), 7.32 (t, 4H, *J* = 8.0 Hz), 7.53 (d, 2H, *J* = 12.0 Hz), 7.74 (d, 2H, *J* = 8.0 Hz), 7.94 (d, 2H, *J* = 8.0 Hz), 10.05 (s, 1H); <sup>13</sup>C NMR (100 MHz, CDCl<sub>3</sub>, δ in ppm): 123.1, 123.4, 124.9, 126.9, 128.0, 129.4, 130.3, 132.7, 134.6, 146.6, 147.3, 148.4, 191.9; HRMS: *m/z* calcd for C<sub>25</sub>H<sub>19</sub>NO [M]<sup>+</sup>: 349.1467, found: 349.1459.

**5-(4-(Diphenylamino)phenyl)thiophene-2-carbaldehyde (3i)**

Bright green solid; Mp: 80.6 - 83.1°C;  $R_f = 0.22$  (5% EA / PE); FT-IR (KBr): 3040, 2938, 2871, 1729, 1666, 1595, 1495, 1453, 1281, 1228, 1056, 812, 754, 695  $\text{cm}^{-1}$ ;  $^1\text{H}$  NMR (400 MHz,  $\text{CDCl}_3$ ,  $\delta$  in ppm): 7.07-7.17 (m, 6H), 7.29 – 7.35 (m, 6H), 7.53 (d, 3H,  $J = 12.0$  Hz), 7.72 (d, 1H,  $J = 4.0$  Hz), 9.88 (s, 1H);  $^{13}\text{C}$  NMR (100 MHz,  $\text{CDCl}_3$ ,  $\delta$  in ppm): 122.3, 122.8, 123.9, 125.0, 126.1, 127.2, 129.5, 137.7, 141.3, 146.9, 149.1, 154.6, 182.6; HRMS:  $m/z$  calcd for  $\text{C}_{23}\text{H}_{17}\text{NOS}$   $[\text{M}]^+$ : 355.1031, found: 355.1026.

#### **4'-(Dimethylamino)-[1,1'-biphenyl]-4-carbaldehyde (3j)**

Bright green solid; Mp: 178.0 – 179.0°C;  $R_f = 0.52$  (DCM); FT-IR (KBr): 3087, 2935, 2870, 1694, 1602, 1370, 1293, 1208, 1172, 950, 811, 692  $\text{cm}^{-1}$ ;  $^1\text{H}$  NMR (400 MHz,  $\text{CDCl}_3$ ,  $\delta$  in ppm): 3.03 (s, 6H), 6.79 (d, 2H,  $J = 8.0$  Hz), 7.57 (d, 2H,  $J = 8.0$  Hz), 7.70 (d, 2H,  $J = 8.0$  Hz), 7.88 (d, 2H,  $J = 8.0$  Hz), 10.00 (s, 1H);  $^{13}\text{C}$  NMR (100 MHz,  $\text{CDCl}_3$ ,  $\delta$  in ppm): 40.3, 112.5, 126.2, 126.9, 128.0, 130.3, 134.0, 147.2, 150.7, 191.9; HRMS:  $m/z$  calcd for  $\text{C}_{15}\text{H}_{15}\text{NO}$   $[\text{M}]^+$ : 225.1154, found: 225.1148.

#### **4'-(Diethylamino)-[1,1'-biphenyl]-4-carbaldehyde (3k)**

Bright green solid; Mp: 97.0 – 98.2°C;  $R_f = 0.31$  (5% EA / PE); FT-IR (KBr): 3097, 2989, 2915, 2838, 1696, 1596, 1536, 1369, 1279, 1204, 1167, 926, 812, 749, 680  $\text{cm}^{-1}$ ;  $^1\text{H}$  NMR (400 MHz,  $\text{CDCl}_3$ ,  $\delta$  in ppm): 1.21 (t, 6H,  $J = 8.0$  Hz), 3.41 (q, 4H,  $J = 8.0$  Hz), 6.74 (d, 2H,  $J = 8.0$  Hz), 7.54 (d, 2H,  $J = 12.0$  Hz), 7.69 (d, 2H,  $J = 8.0$  Hz), 7.87 (d, 2H,  $J = 8.0$  Hz), 9.99 (s, 1H);  $^{13}\text{C}$  NMR (100 MHz,  $\text{CDCl}_3$ ,  $\delta$  in ppm): 12.6, 44.4, 111.7, 125.7, 126.0, 128.3, 130.3, 133.8, 147.3, 148.0, 191.9; HRMS:  $m/z$  calcd for  $\text{C}_{17}\text{H}_{19}\text{NO}$   $[\text{M}]^+$ : 253.1467, found: 253.1461.

#### **2-((4'-(Diphenylamino)-[1,1'-biphenyl]-4-yl)methylene)malononitrile (6a)**

Yellowish red semi solid;  $R_f = 0.36$  (5% EA / PE); FT-IR (KBr): 3030, 2924, 2857, 2225, 1579, 1488, 1331, 1277, 1196, 1081, 824, 753, 697  $\text{cm}^{-1}$ ;  $^1\text{H}$  NMR (400 MHz,  $\text{CDCl}_3$ ,  $\delta$  in ppm): 7.10 – 7.21 (m, 8H), 7.31 – 7.36 (m, 4H), 7.54 (d, 2H,  $J = 12.0$  Hz), 7.74 (s, 1H), 7.77 (d, 2H,  $J = 4.0$  Hz), 7.98 (d, 2H,  $J = 8.0$  Hz);  $^{13}\text{C}$  NMR (100 MHz,  $\text{CDCl}_3$ ,  $\delta$  in ppm): 80.9, 113.0, 114.1, 122.6, 123.8, 125.1, 127.0, 127.9, 129.1, 129.5, 131.5, 131.6, 146.8, 147.1, 149.0, 159.1; HRMS:  $m/z$  calcd for  $\text{C}_{28}\text{H}_{19}\text{N}_3$   $[\text{M}]^+$ : 397.1579, found: 397.1574.

**2-((5-(4-(Diphenylamino)phenyl)thiophen-2-yl)methylene)malononitrile (6b)**

Brown semi solid;  $R_f = 0.11$  (10% EA / PE); FT-IR (KBr): 3044, 2939, 2865, 2227, 1578, 1496, 1436, 1330, 1200, 1077, 819, 760, 700  $\text{cm}^{-1}$ ;  $^1\text{H}$  NMR (500 MHz,  $\text{CDCl}_3$ ,  $\delta$  in ppm): 7.06 (d, 2H,  $J = 10.0$  Hz), 7.12 – 7.18 (m, 5H), 7.54 (d, 2H,  $J = 10.0$  Hz), 7.69 (d, 1H,  $J = 5.0$  Hz), 7.76 (s, 1H);  $^{13}\text{C}$  NMR (125 MHz,  $\text{CDCl}_3$ ,  $\delta$  in ppm): 75.1, 113.6, 114.5, 121.7, 123.3, 124.3, 124.8, 125.5, 127.5, 129.6, 133.1, 140.3, 146.6, 149.9, 150.2, 157.1; HRMS:  $m/z$  calcd for  $\text{C}_{26}\text{H}_{17}\text{N}_3\text{S}$   $[\text{M}]^+$ : 403.1143, found: 403.1141.

**2-((4'-(Dimethylamino)-[1,1'-biphenyl]-4-yl)methylene)malononitrile (6c)**

Dark red semi solid;  $R_f = 0.26$  (10% EA / PE); FT-IR (KBr): 3079, 2937, 2872, 2236, 1608, 1467, 1379, 1265, 1183, 1105, 813, 725  $\text{cm}^{-1}$ ;  $^1\text{H}$  NMR (500 MHz,  $\text{CDCl}_3$ ,  $\delta$  in ppm): 3.03 (s, 6H), 6.59 (d, 1H,  $J = 5.0$  Hz), 6.79 (d, 2H,  $J = 10.0$  Hz), 7.56 (d, 2H,  $J = 10.0$  Hz), 7.62 (d, 3H,  $J = 10.0$  Hz), 7.71 (s, 1H);  $^{13}\text{C}$  NMR (125 MHz,  $\text{CDCl}_3$ ,  $\delta$  in ppm): 40.3, 81.4, 112.0, 112.5, 114.0, 126.4, 127.7, 129.7, 131.6, 136.1, 139.2, 150.4, 160.0; HRMS:  $m/z$  calcd for  $\text{C}_{18}\text{H}_{15}\text{N}_3$   $[\text{M}]^+$ : 273.1266, found: 273.1260.

**2-((4'-(Diethylamino)-[1,1'-biphenyl]-4-yl)methylene)malononitrile (6d)**



Red semi solid;  $R_f = 0.27$  (10% EA / PE); FT-IR (KBr): 3062, 2936, 2873, 2226, 1632, 1406, 1277, 1196, 1134, 660  $\text{cm}^{-1}$ ;  $^1\text{H}$  NMR (500 MHz,  $\text{CDCl}_3$ ,  $\delta$  in ppm): 1.23 (t, 6H,  $J = 5.0$  Hz), 3.45 (q, 4H,  $J = 5.0$  Hz), 6.77 (d, 2H,  $J = 10.0$  Hz), 7.56 (d, 2H,  $J = 10.0$  Hz), 7.62 (d, 2H,  $J = 10.0$  Hz), 7.66 (d, 2H,  $J = 10.0$  Hz), 7.72 (s, 1H);  $^{13}\text{C}$  NMR (125 MHz,  $\text{CDCl}_3$ ,  $\delta$  in ppm): 12.6, 44.4, 81.1, 111.8, 113.9, 121.0, 126.0, 126.2, 128.0, 128.3, 129.7, 131.7, 150.5, 160.1; HRMS:  $m/z$  calcd for  $\text{C}_{20}\text{H}_{19}\text{N}_3$   $[\text{M}]^+$ : 301.1579, found: 301.1573.

**5''-((4-(Dimethylamino)phenyl)ethynyl)-[2,2':5',2''-terthiophene]-5-carbaldehyde (5f)**

brown solid;  $^1\text{H}$  NMR (500 MHz,  $\text{CDCl}_3$ ,  $\delta$  in ppm): 3.01 (s, 6H), 6.62 (d, 2H,  $J = 10.0$  Hz), 6.98 (d, 1H,  $J = 5.0$  Hz), 7.02 (d, 1H,  $J = 5.0$  Hz), 7.08 (d, 1H,  $J = 5.0$  Hz), 7.25 (d, 1H,  $J = 5.0$  Hz), 7.27 (d, 1H,  $J = 5.0$  Hz), 7.40 (d, 2H,  $J = 10.0$  Hz), 7.69 (d, 1H,  $J = 5.0$  Hz), 9.89 (s, 1H).  $^{13}\text{C}$  NMR (125 MHz,  $\text{CDCl}_3$ ,  $\delta$  in ppm): 40.1, 72.6, 82.3, 111.7, 112.1, 124.2, 124.5, 124.9, 126.8, 130.9, 131.7, 132.6, 133.6, 134.9, 137.2, 141.8, 146.4, 150.3, 182.4; HRMS:  $m/z$  calcd for  $\text{C}_{23}\text{H}_{17}\text{NOS}_3$   $[\text{M}]^+$ : 419.0472, found: 419.0466.

**5-((4-(Dimethylamino)phenyl)ethynyl)thieno[3,2-b]thiophene-2-carbaldehyde (5g)**

dark brown solid;  $^1\text{H}$  NMR (500 MHz,  $\text{CDCl}_3$ ,  $\delta$  in ppm): 3.04 (s, 6H), 6.67 (d, 2H,  $J = 5.0$  Hz), 7.38 (s, 1H), 7.43 (d, 2H,  $J = 5.0$  Hz), 7.86 (s, 1H), 9.97 (s, 1H);  $^{13}\text{C}$  NMR (125 MHz,  $\text{CDCl}_3$ ,  $\delta$  in ppm): 40.1, 80.9, 99.3, 108.3, 111.7, 122.9, 128.8, 132.7, 132.8, 138.7, 145.3, 145.7, 150.6, 183.1; HRMS:  $m/z$  calcd for  $\text{C}_{17}\text{H}_{13}\text{NOS}_2$   $[\text{M}]^+$ : 311.0439, found: 311.0436.

**2,6-bis(3-Hexylthiophen-2-yl)dithieno[3,2-b:2',3'-d]thiophene (3g)**

Yellow solid;  $^1\text{H}$  NMR (500 MHz,  $\text{CDCl}_3$ ,  $\delta$  in ppm): 0.9 (t, 6H,  $J = 5.0$  Hz), 1.32-1.42 (m, 12H), 1.69 (p, 4H,  $J = 5.0$  Hz), 2.83 (t, 4H,  $J = 10.0$  Hz), 6.99 (d, 2H,  $J = 5.0$  Hz), 7.24 (d, 2H,  $J = 5.0$  Hz), 7.31 (s, 2H);  $^{13}\text{C}$  NMR (125 MHz,  $\text{CDCl}_3$ ,  $\delta$  in ppm): 14.0, 22.6, 29.2, 29.2, 30.7, 31.6, 119.2,

124.4, 130.1, 130.5, 130.6, 136.9, 140.3, 140.9; HRMS:  $m/z$  calcd for  $C_{28}H_{32}S_5 [M]^+$ : 528.1108, found: 528.1101.

## References

1. B. Karimi, D. Elhamifar, J. H. Clark and J. Hunt, *Chem. Eur. J.* **2010**, *16*, 8047-8053.
2. L. Wu, B.-L. Li, Y.-Y. Huang, H.-F. Zhou, Y.-M. He, Q.-H. Fan, *Org. Lett.* **2006**, *8*, 3605-3608.
3. D.-H. Lee, M. Choi, B.-W. Yu, R. Ryoo, A. Taher, S. Hossain, M. J. Jin, *Adv.Synth. Catal.* **2009**, *351*, 2912-2920.
4. A. Zapf, M. Beller, *Chem. Eur. J.* **2000**, *6*, 1830-1833.
5. L. A. Carpino, H.-W. Chen, *J. Am. Chem. Soc.* **1979**, *101*, 390-394.
6. J. M. Huggins, R. G. Bergman, *J. Am. Chem. Soc.* **1981**, *103*, 3002-3011.
7. D. H. Hunter, D. J. Cram, *J. Am. Chem. Soc.* **1966**, *88*, 5765-5776.
8. L. A. Paquette, L. S. Wittenbrook, *J. Am. Chem. Soc.* **1967**, *89*, 4483-4487.
9. K. Yoshida, T. Fueno, *J. Org. Chem.* **1973**, *38*, 1045-1046.
10. R. Bandari, T. Hoeche, A. Prager, K. Dirnberger, M. R. Buchmeiser, *Chem. Eur. J.* **2010**, *16*, 4650-4658.

III.  $^1\text{H}$  NMR &  $^{13}\text{C}$  NMR of **3g**, **5f**, **5g**, **3h-3k** and **6a-6d**

$^1\text{H}$  NMR spectrum of compound **3g** in  $\text{CDCl}_3$

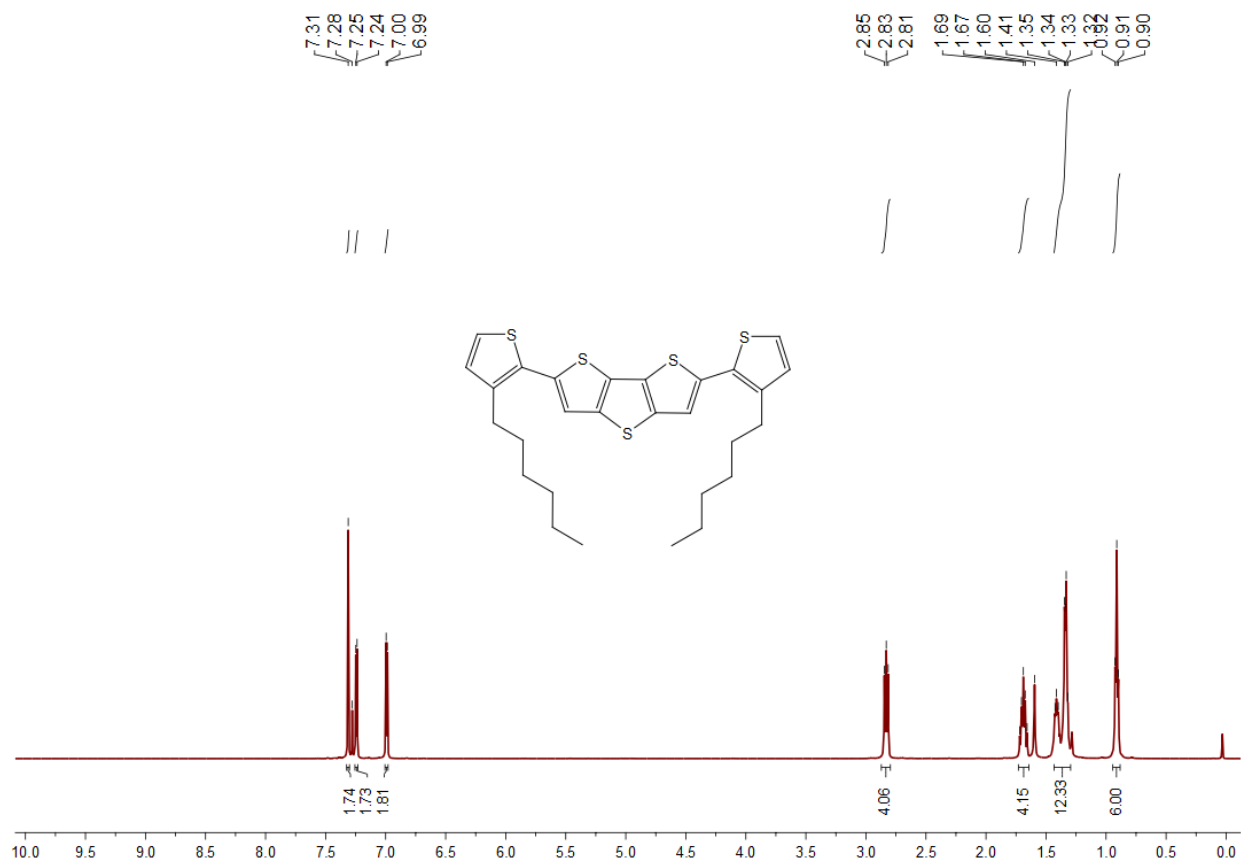

$^{13}\text{C}$  NMR spectrum of compound **3g** in  $\text{CDCl}_3$

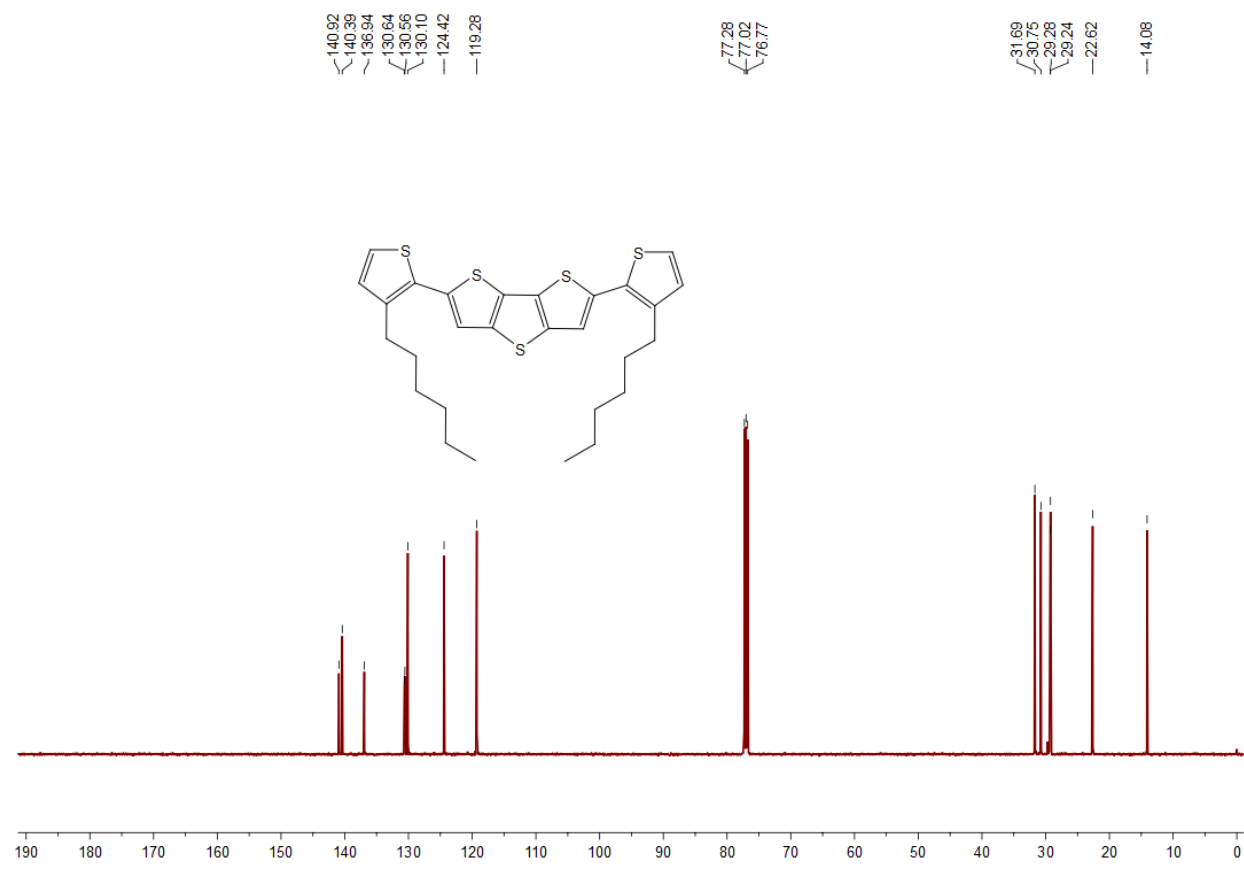

$^1\text{H}$  NMR spectrum of compound **5f** in  $\text{CDCl}_3$

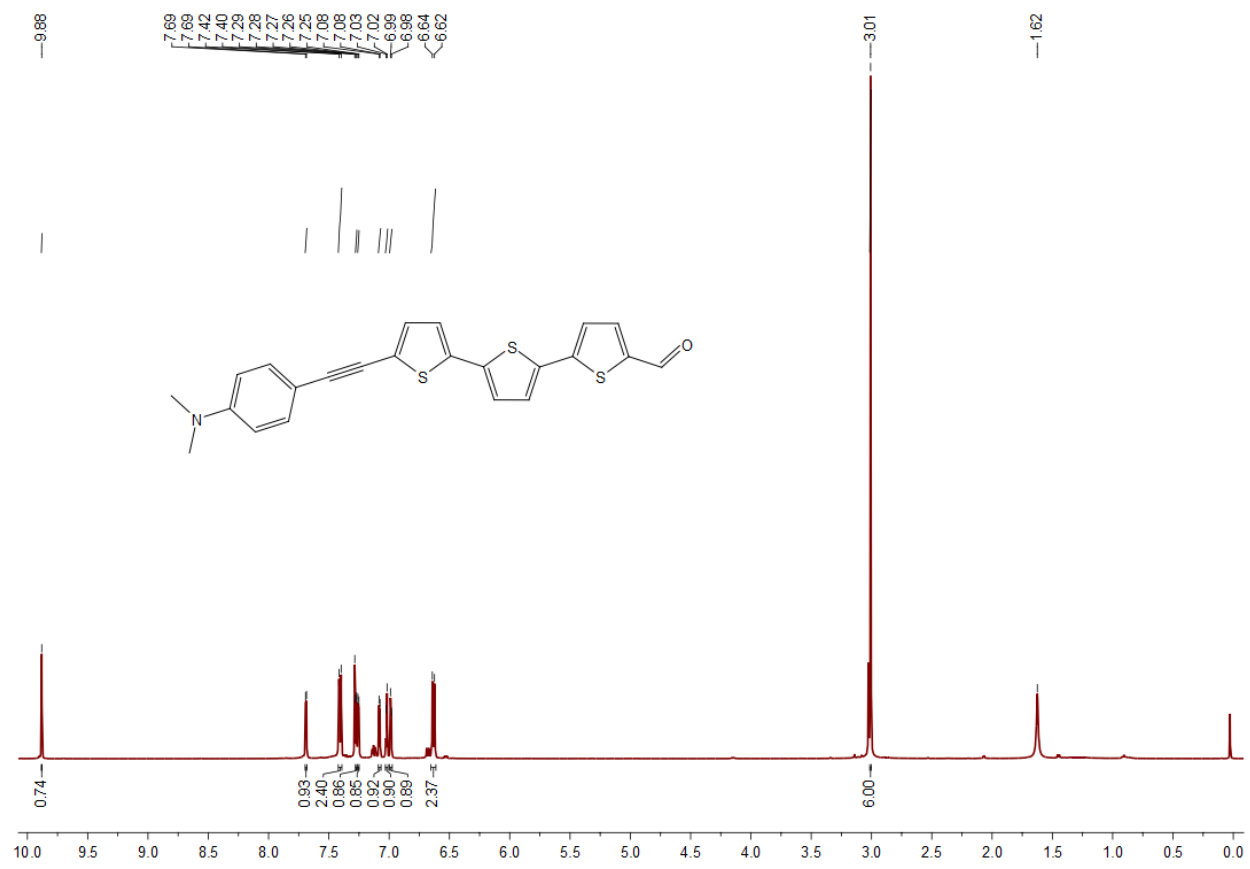

$^{13}\text{C}$  NMR spectrum of compound **5f** in  $\text{CDCl}_3$

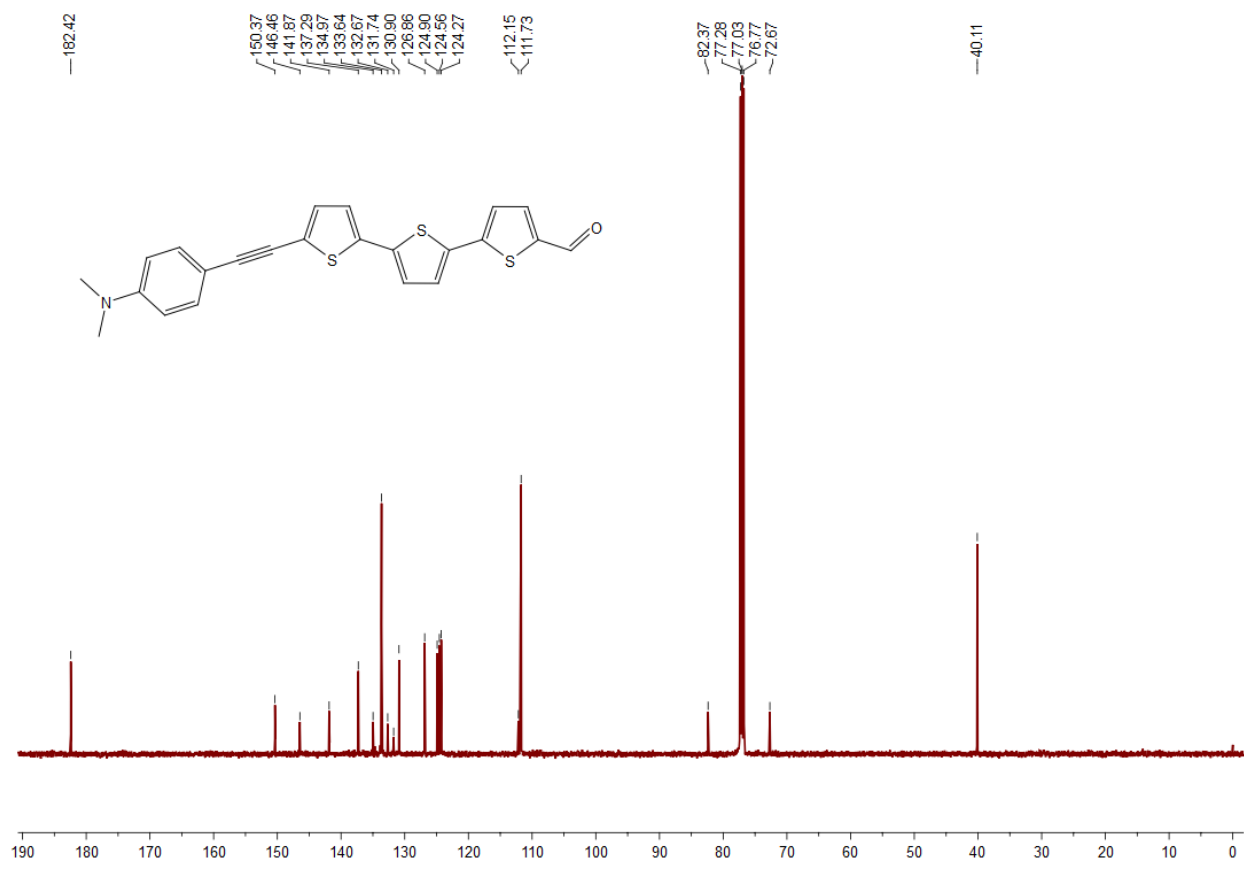

$^1\text{H}$  NMR spectrum of compound **5g** in  $\text{CDCl}_3$

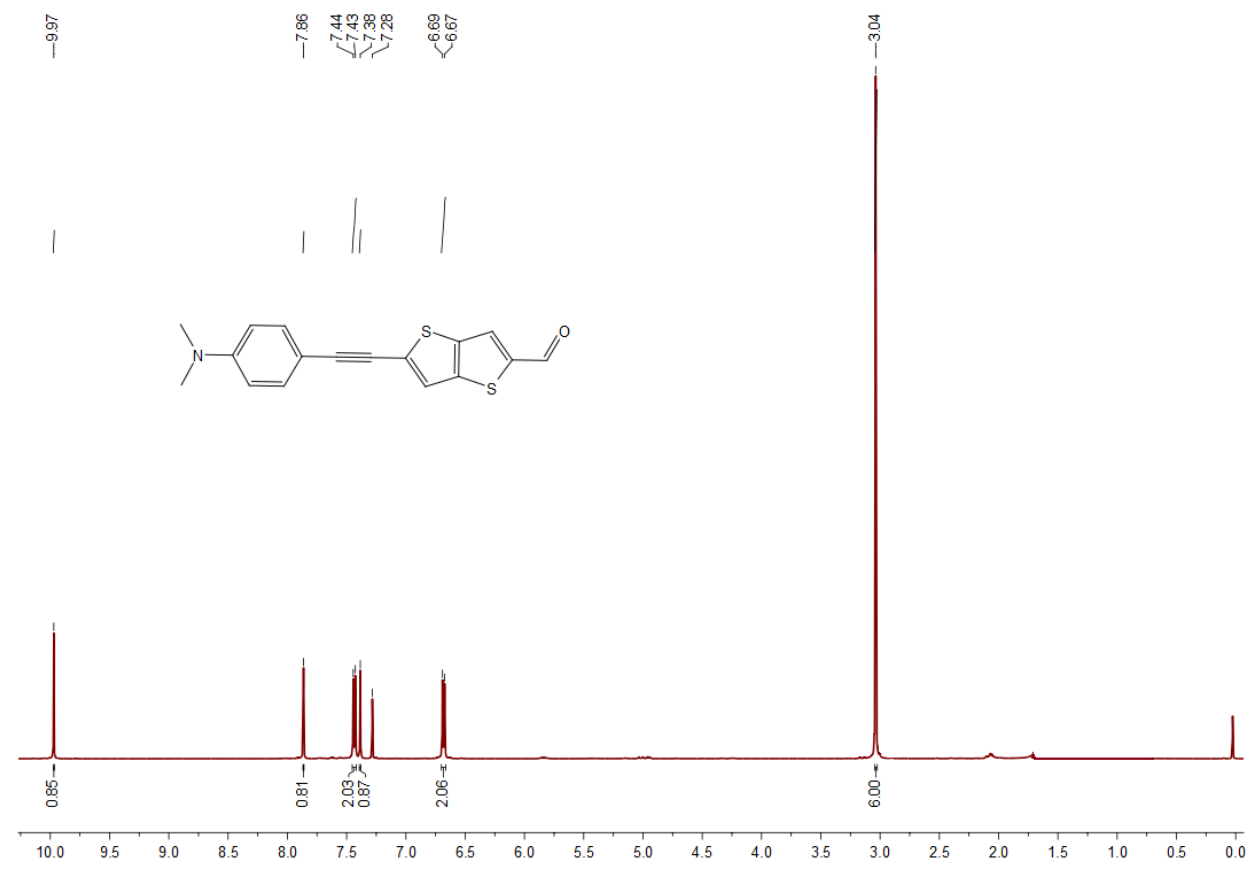

$^{13}\text{C}$  NMR spectrum of compound **5g** in  $\text{CDCl}_3$

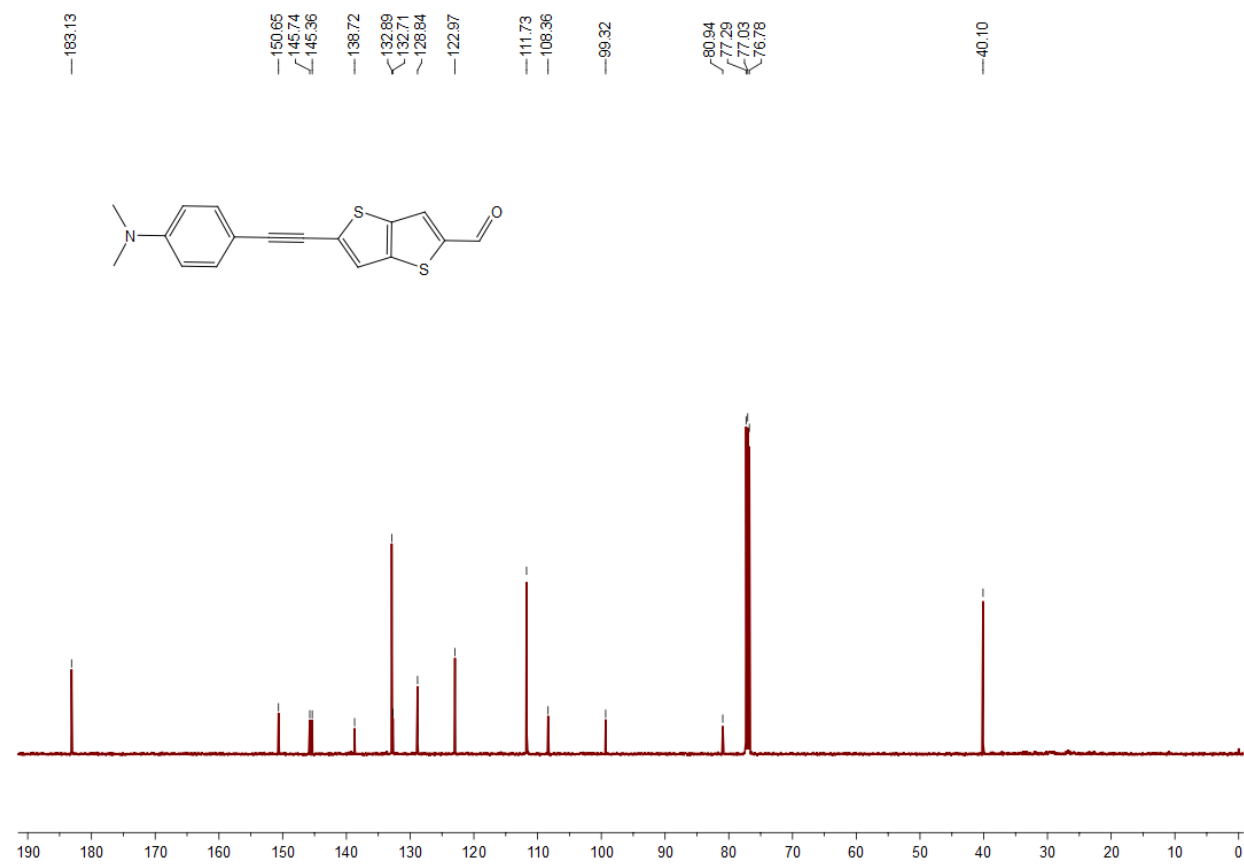



$^1\text{H}$  NMR spectrum of compound **3h** in  $\text{CDCl}_3$

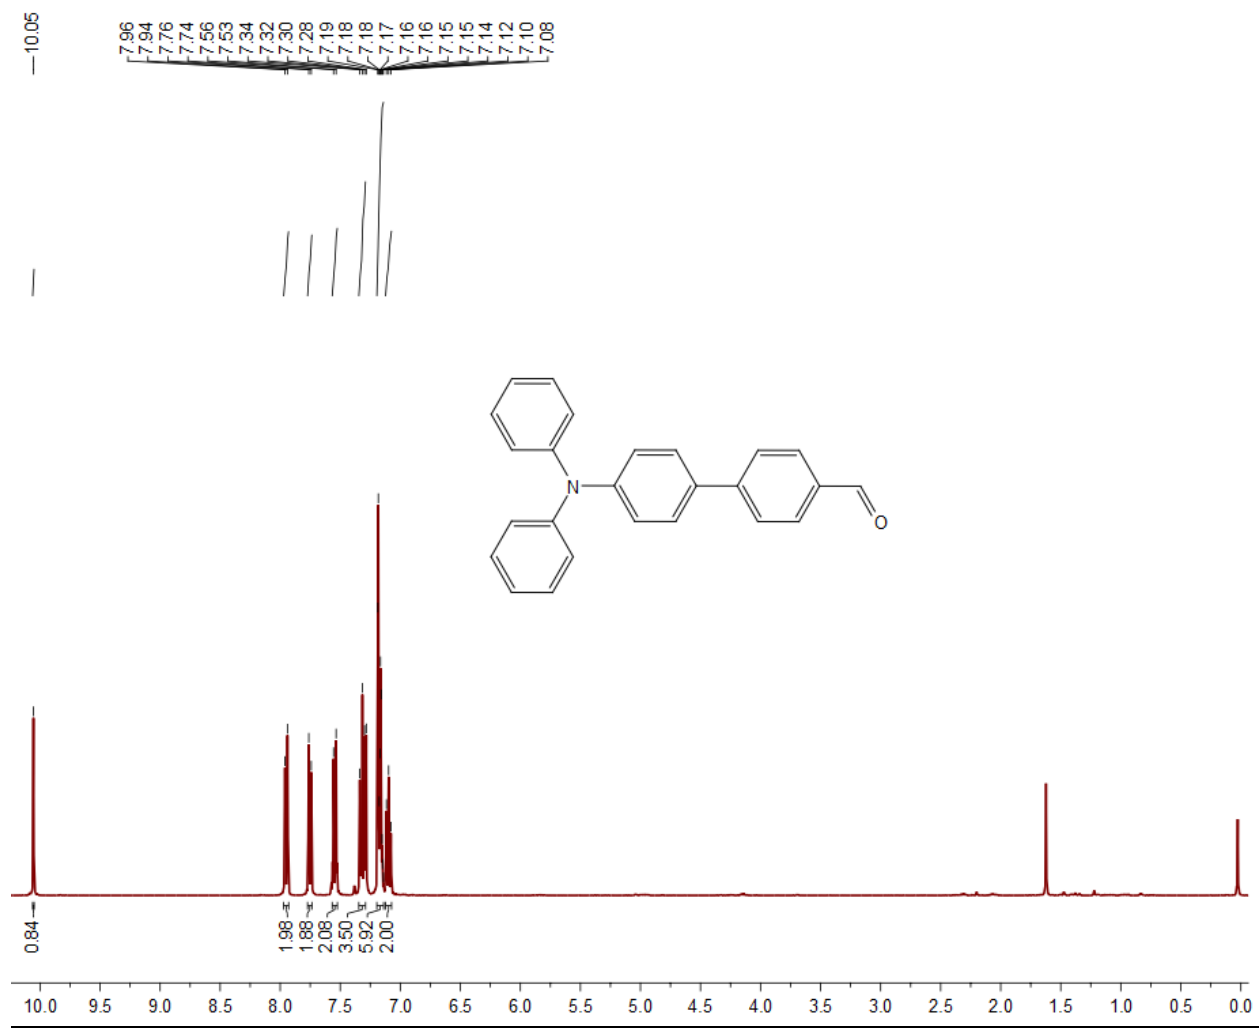

$^{13}\text{C}$  NMR spectrum of compound **3h** in  $\text{CDCl}_3$

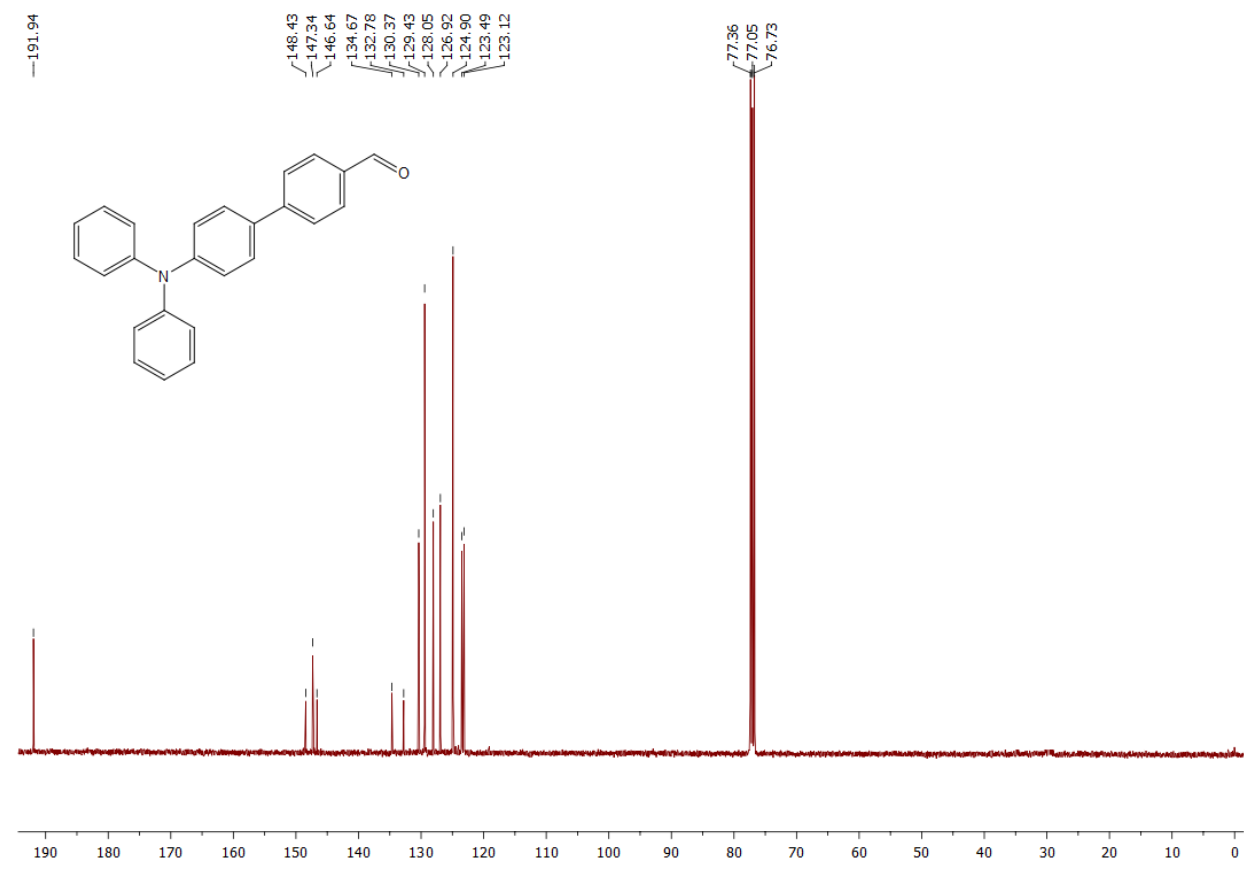

$^1\text{H}$  NMR spectrum of compound **3i** in  $\text{CDCl}_3$

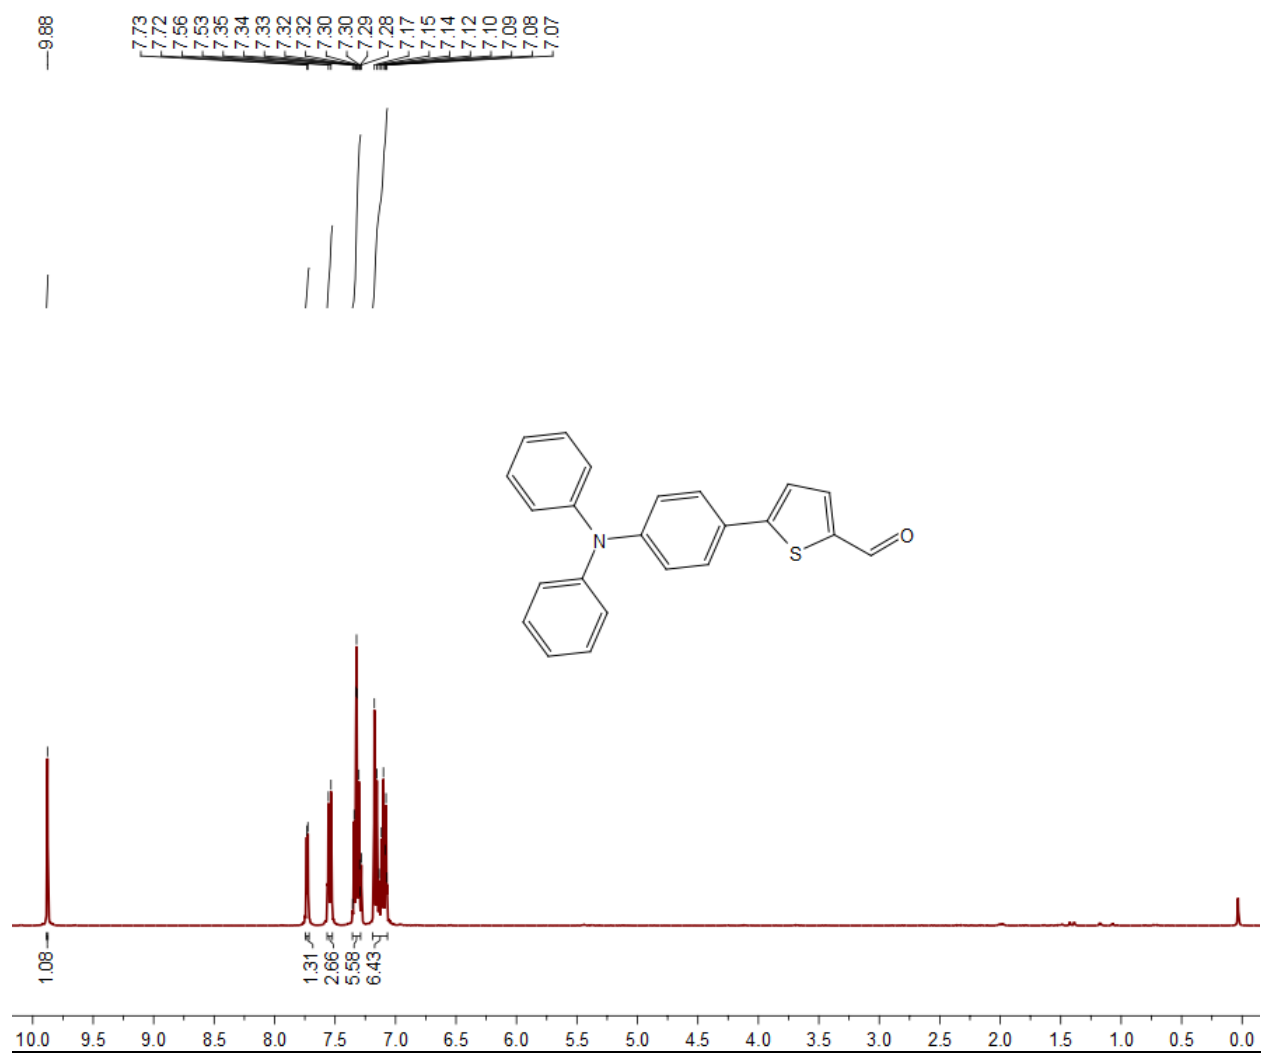

$^{13}\text{C}$  NMR spectrum of compound **3i** in  $\text{CDCl}_3$

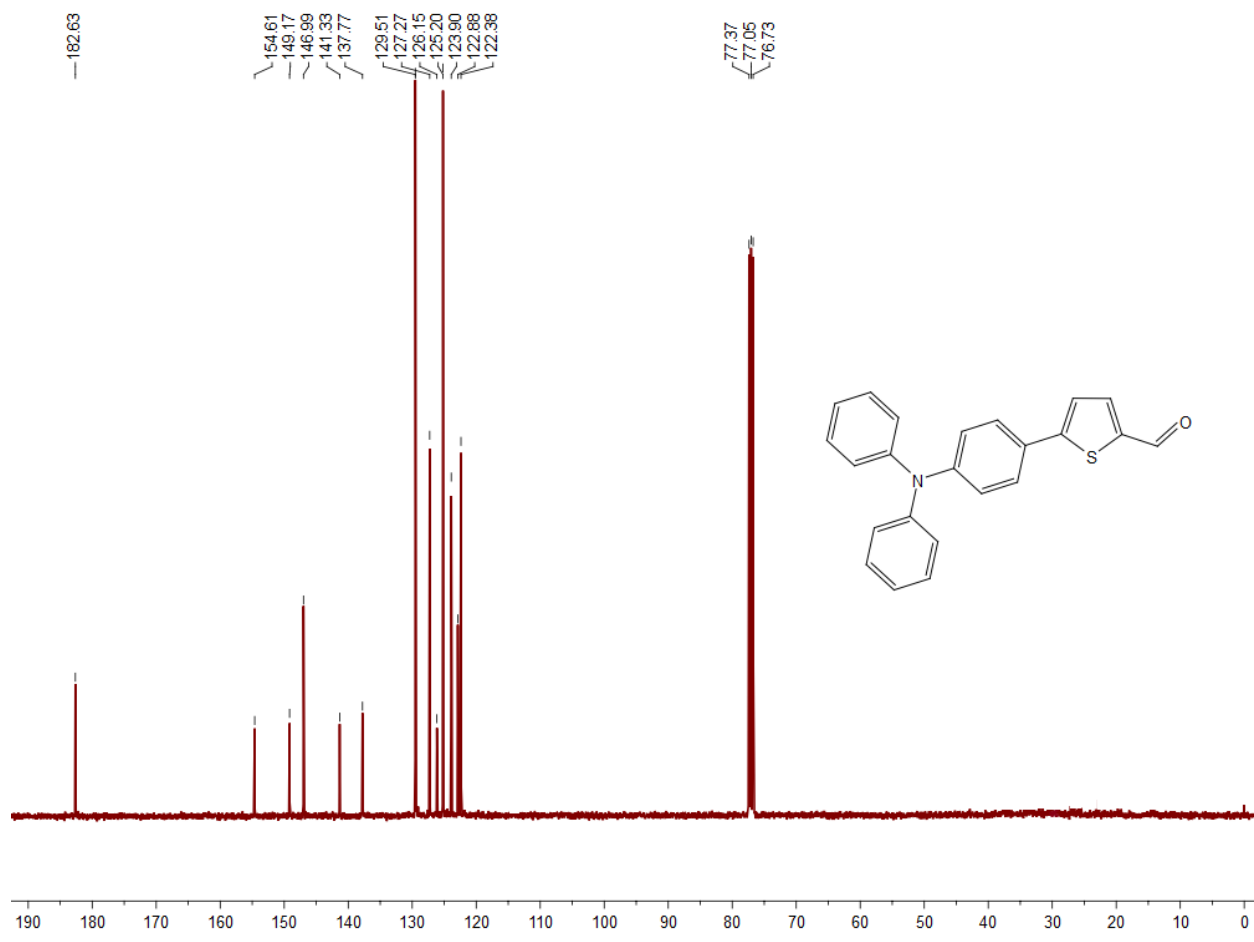

$^1\text{H}$  NMR spectrum of compound **3j** in  $\text{CDCl}_3$

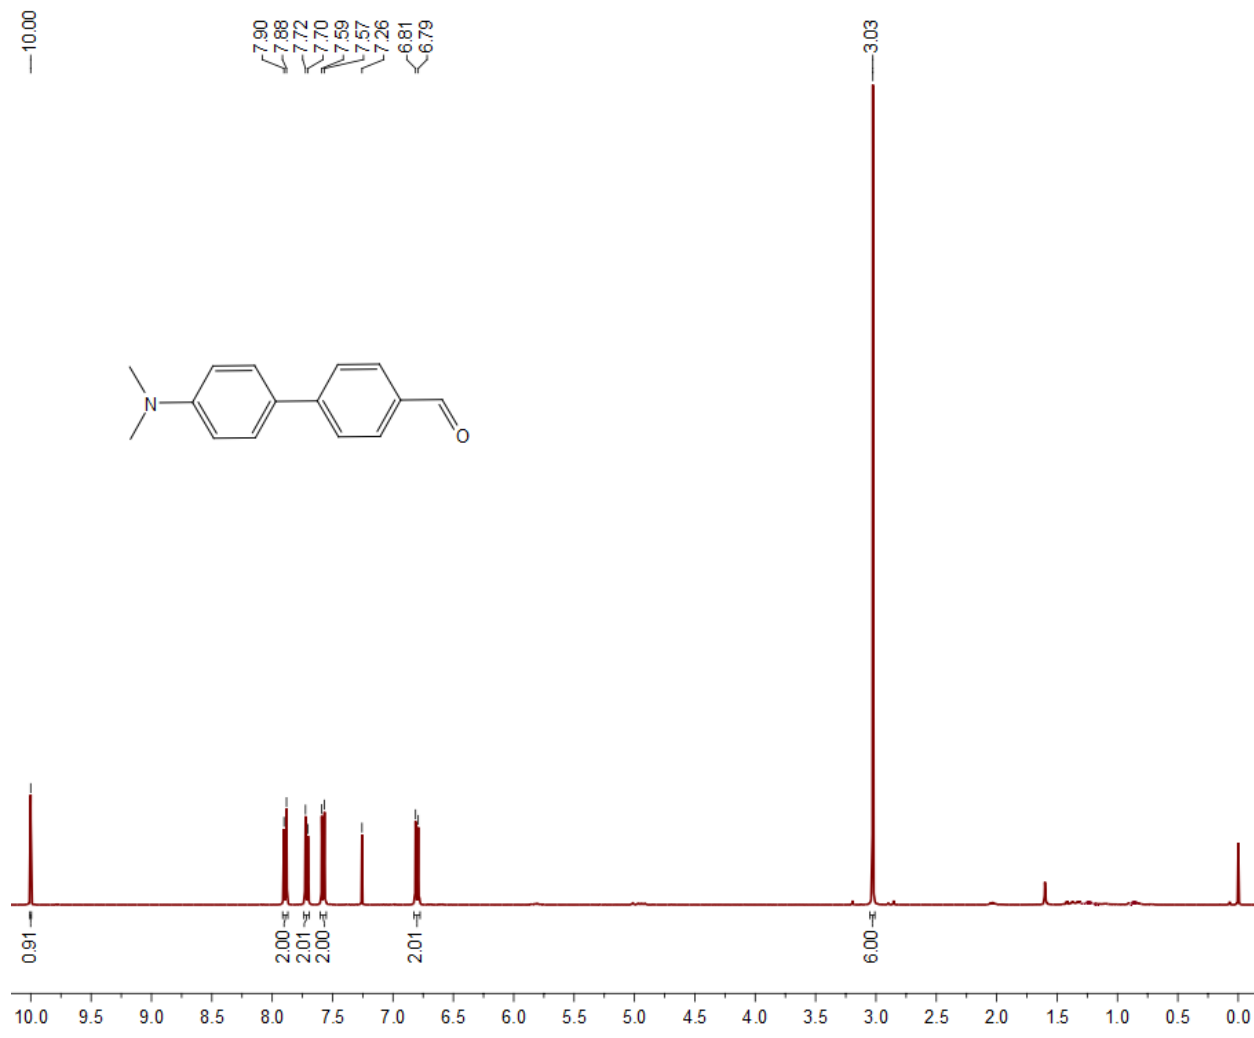

$^{13}\text{C}$  NMR spectrum of compound **3j** in  $\text{CDCl}_3$

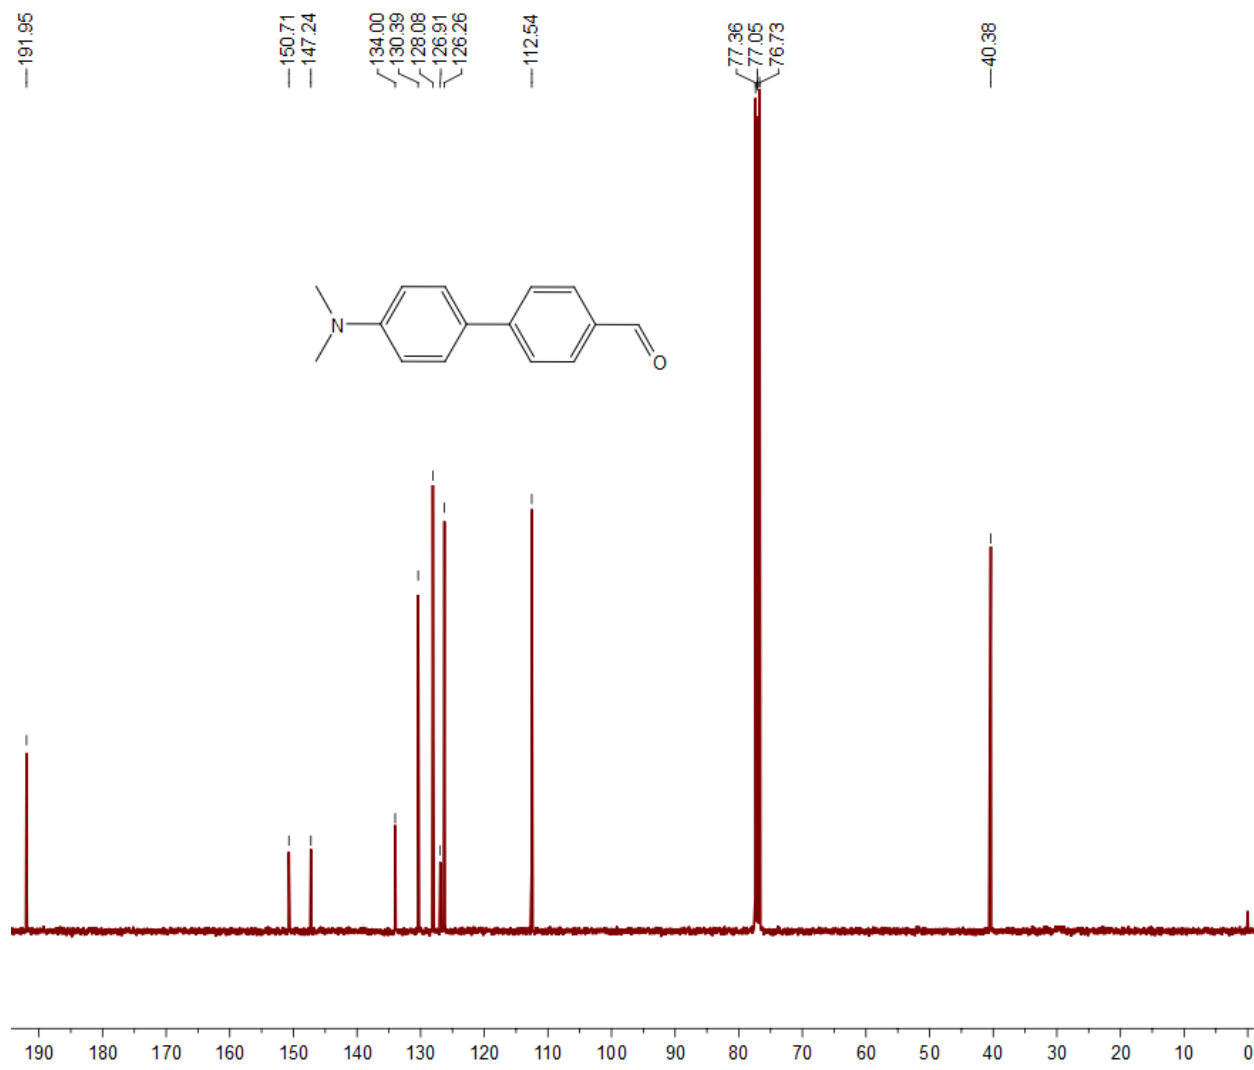

$^1\text{H}$  NMR spectrum of compound **3k** in  $\text{CDCl}_3$

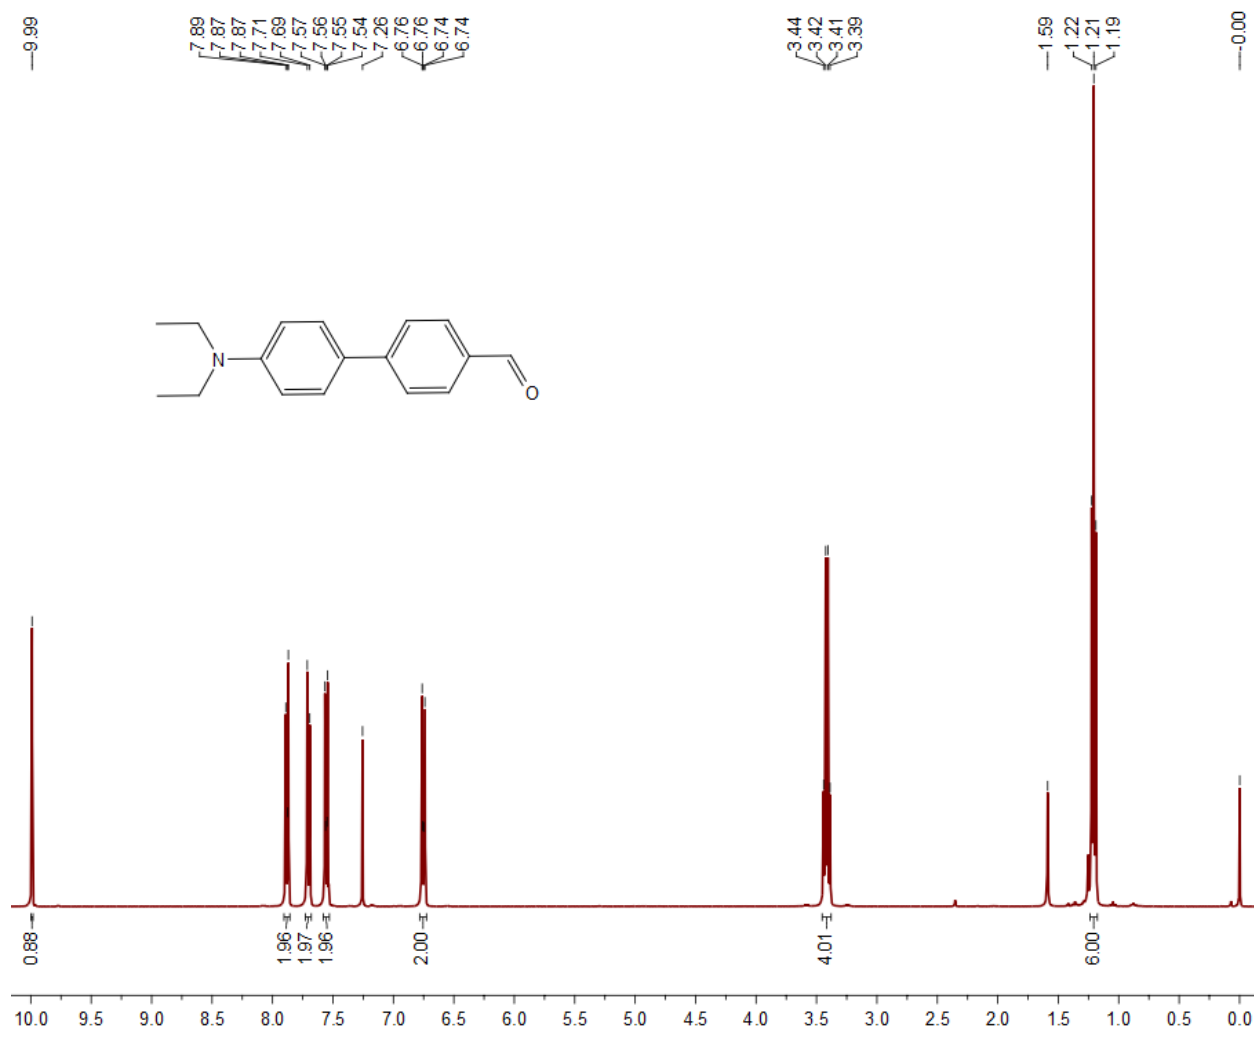

$^{13}\text{C}$  NMR spectrum of compound **3j** in  $\text{CDCl}_3$

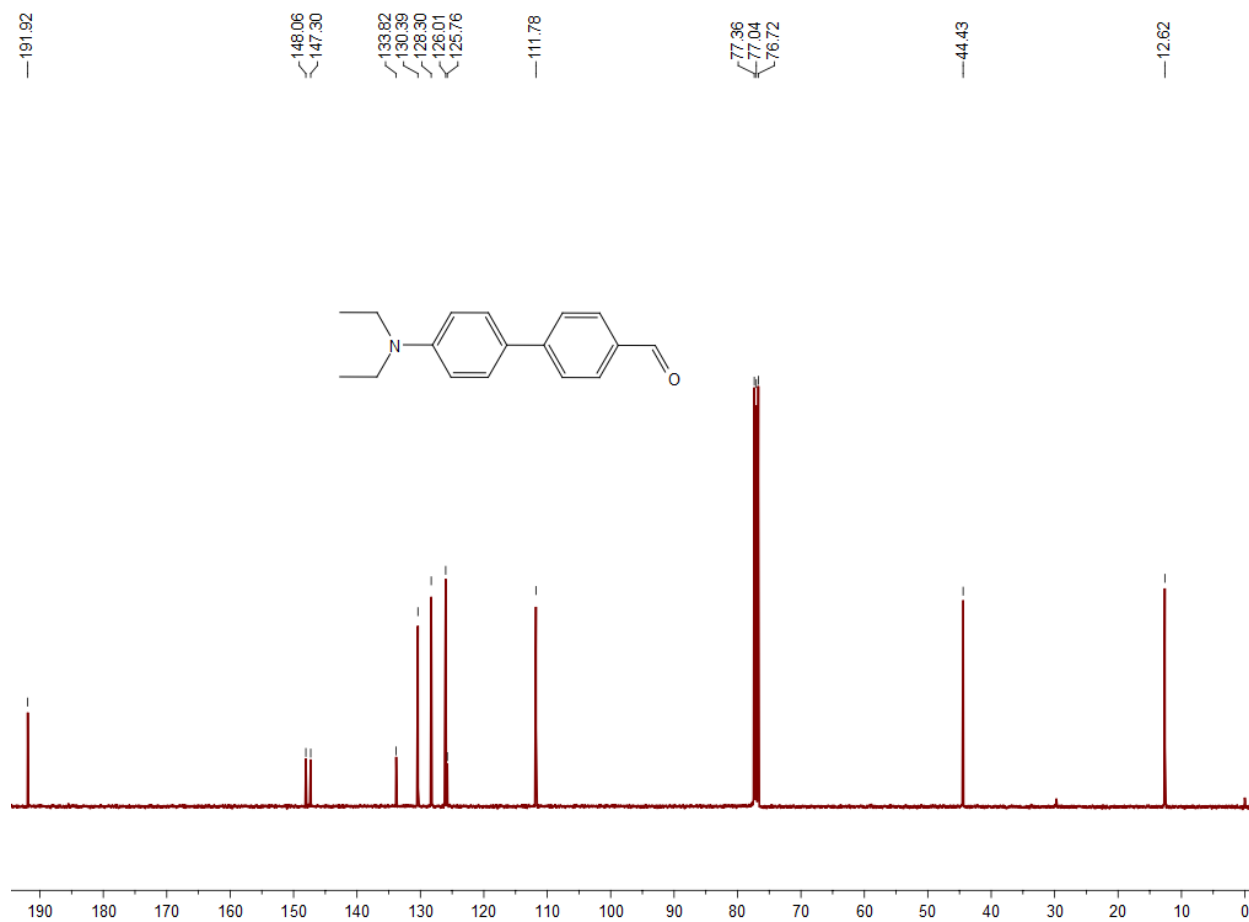



<sup>1</sup>H NMR spectrum of compound **6a** in CDCl<sub>3</sub>

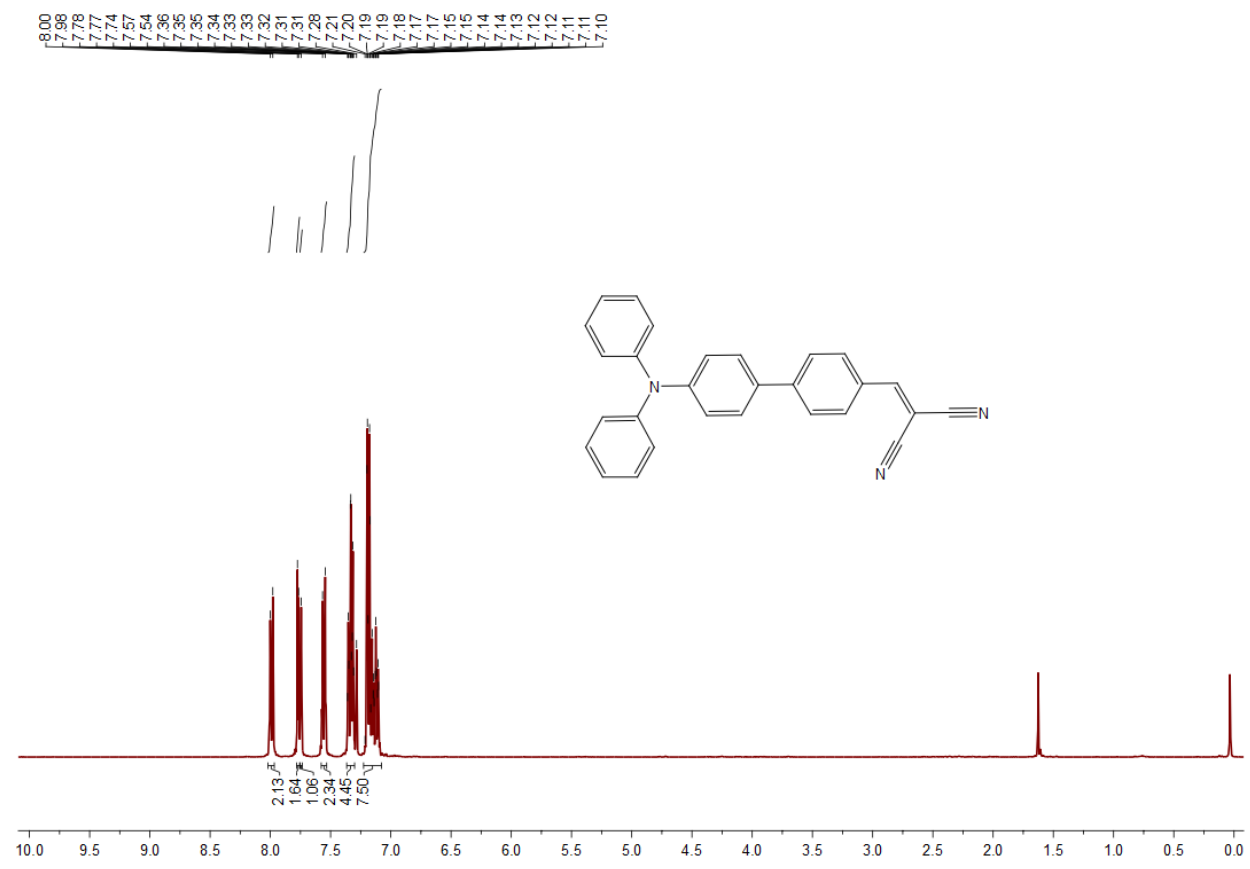

$^{13}\text{C}$  NMR spectrum of compound **6a** in  $\text{CDCl}_3$

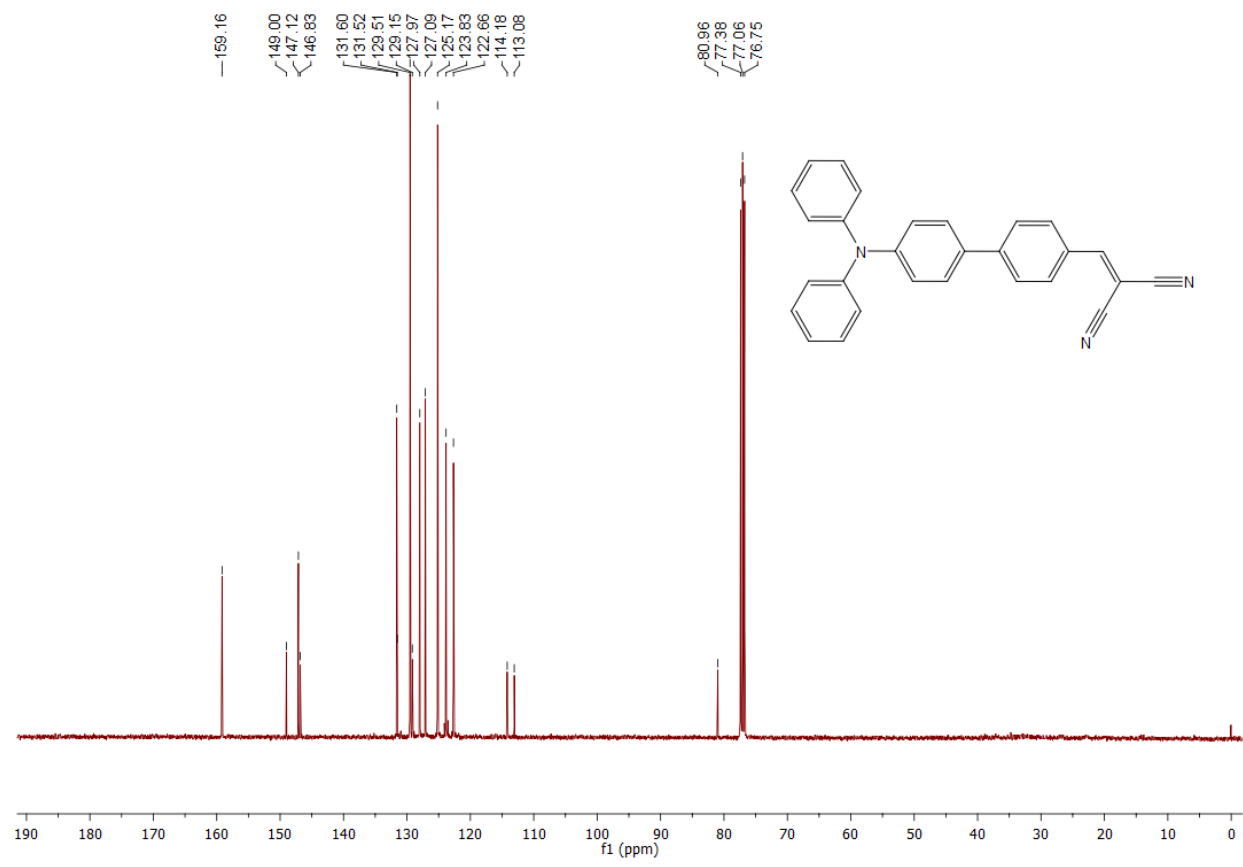

$^1\text{H}$  NMR spectrum of compound **6b** in  $\text{CDCl}_3$

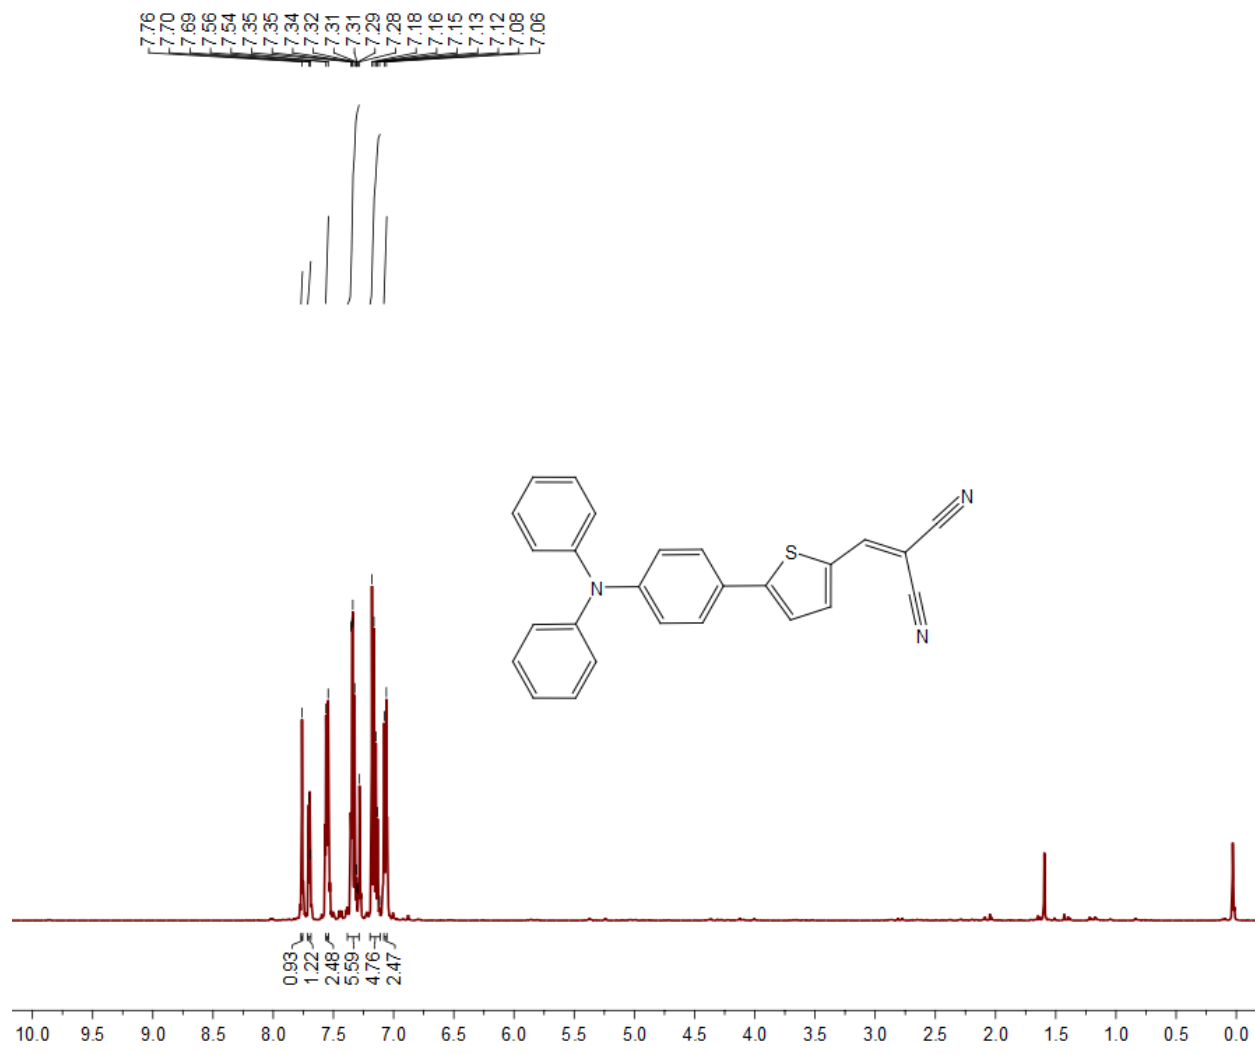

$^{13}\text{C}$  NMR spectrum of compound **6b** in  $\text{CDCl}_3$

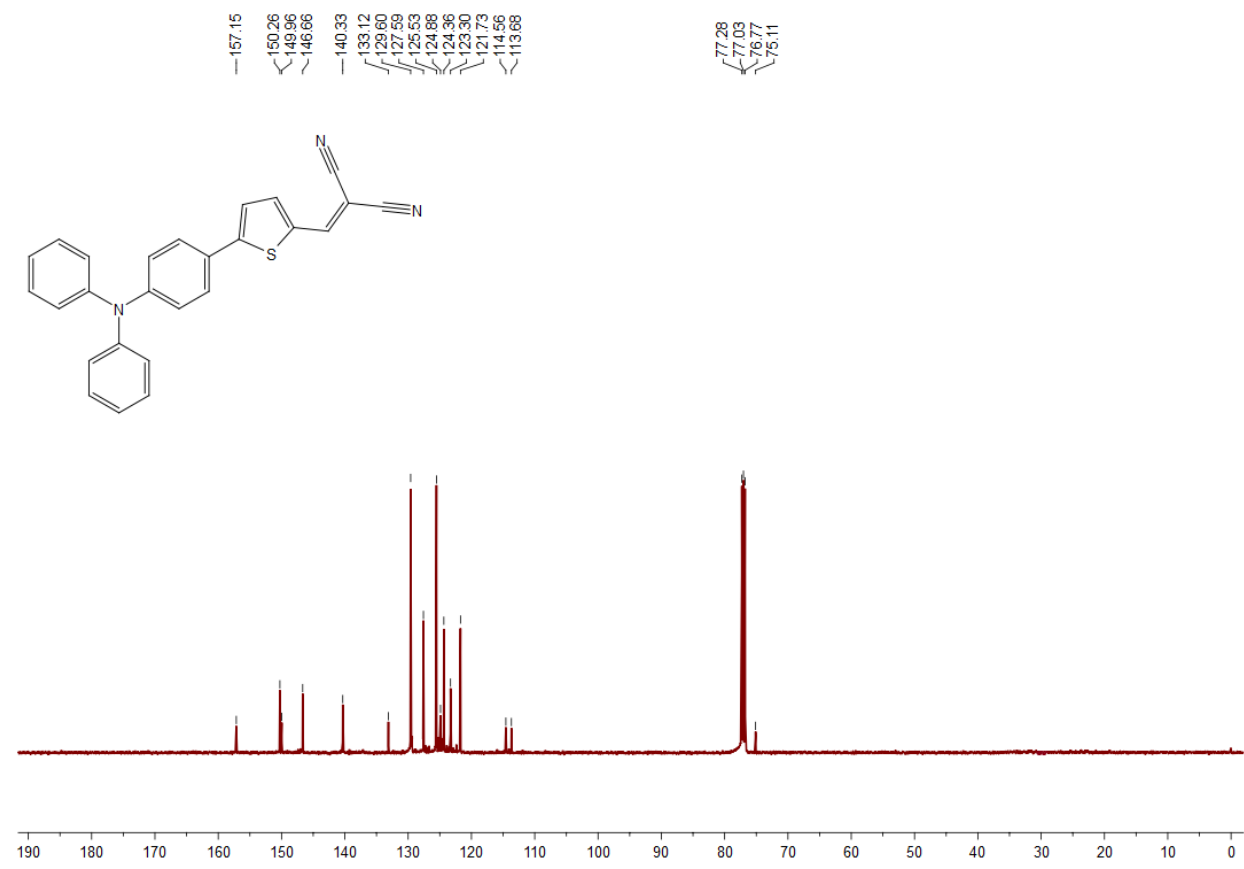

$^1\text{H}$  NMR spectrum of compound **6c** in  $\text{CDCl}_3$

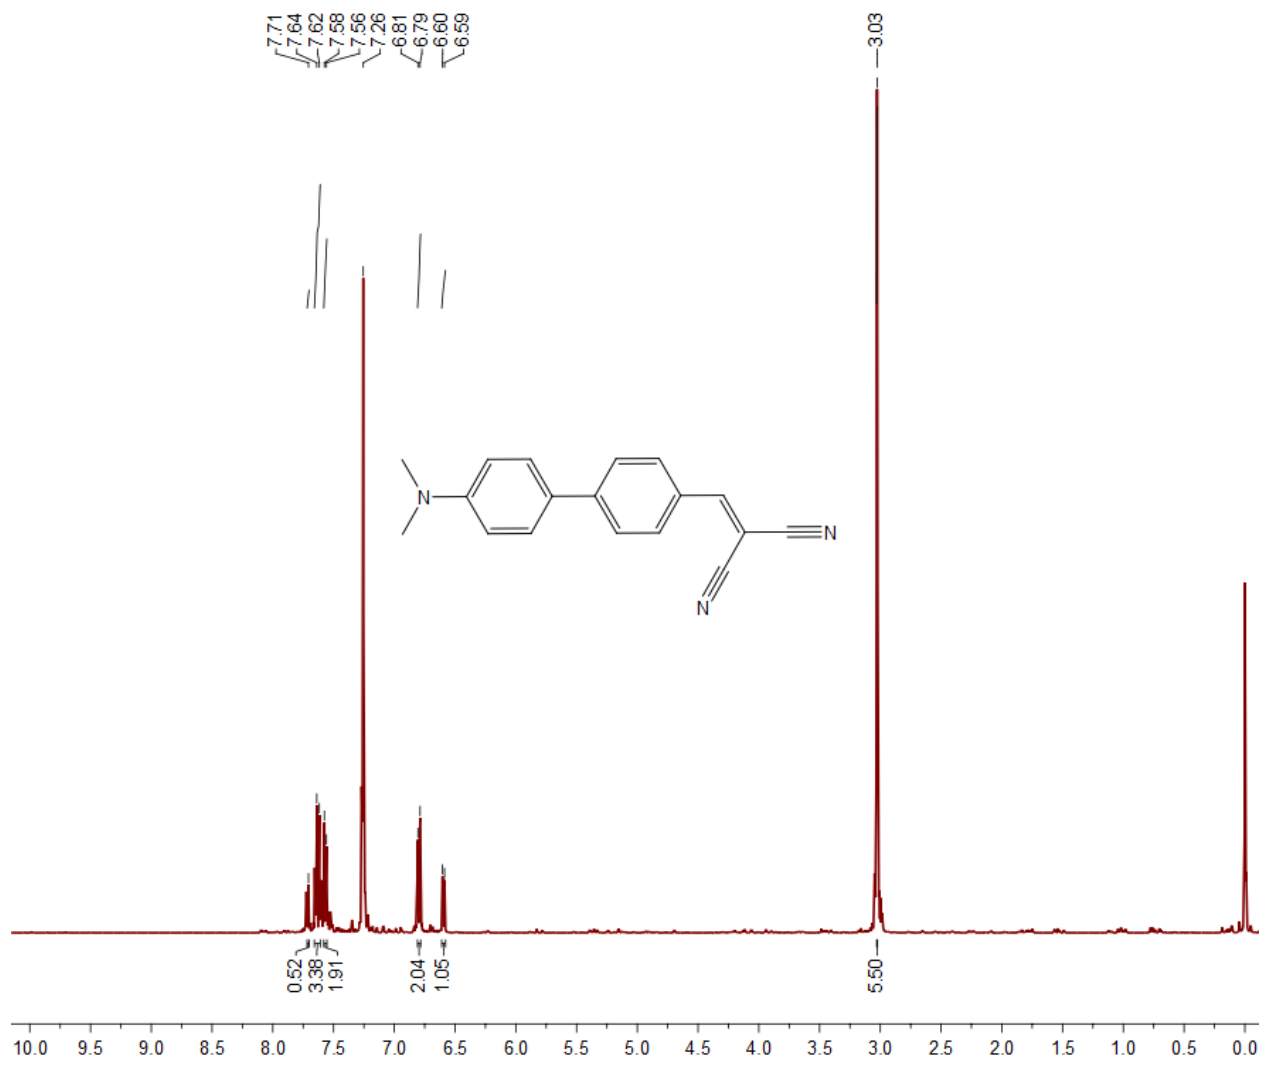

$^{13}\text{C}$  NMR spectrum of compound **6c** in  $\text{CDCl}_3$

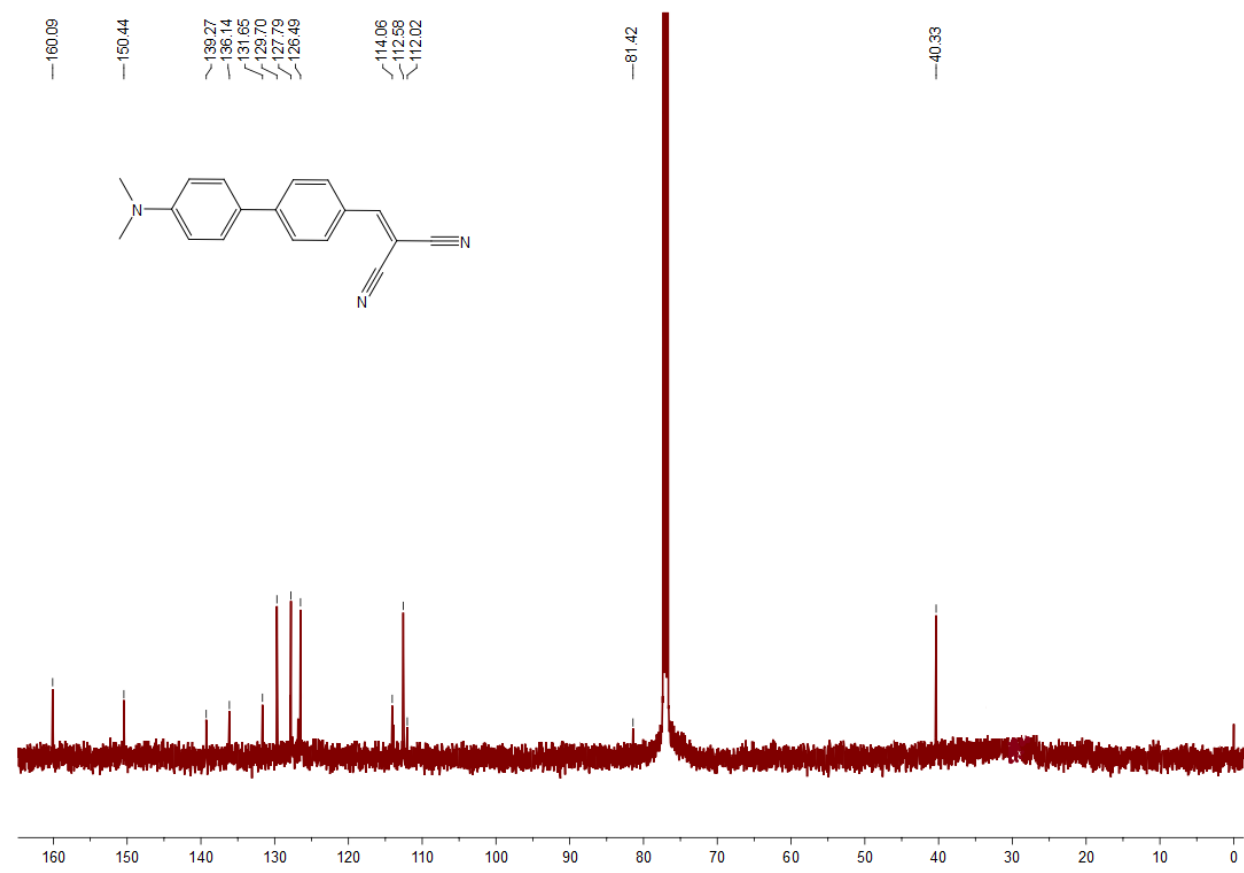

$^1\text{H}$  NMR spectrum of compound **6d** in  $\text{CDCl}_3$

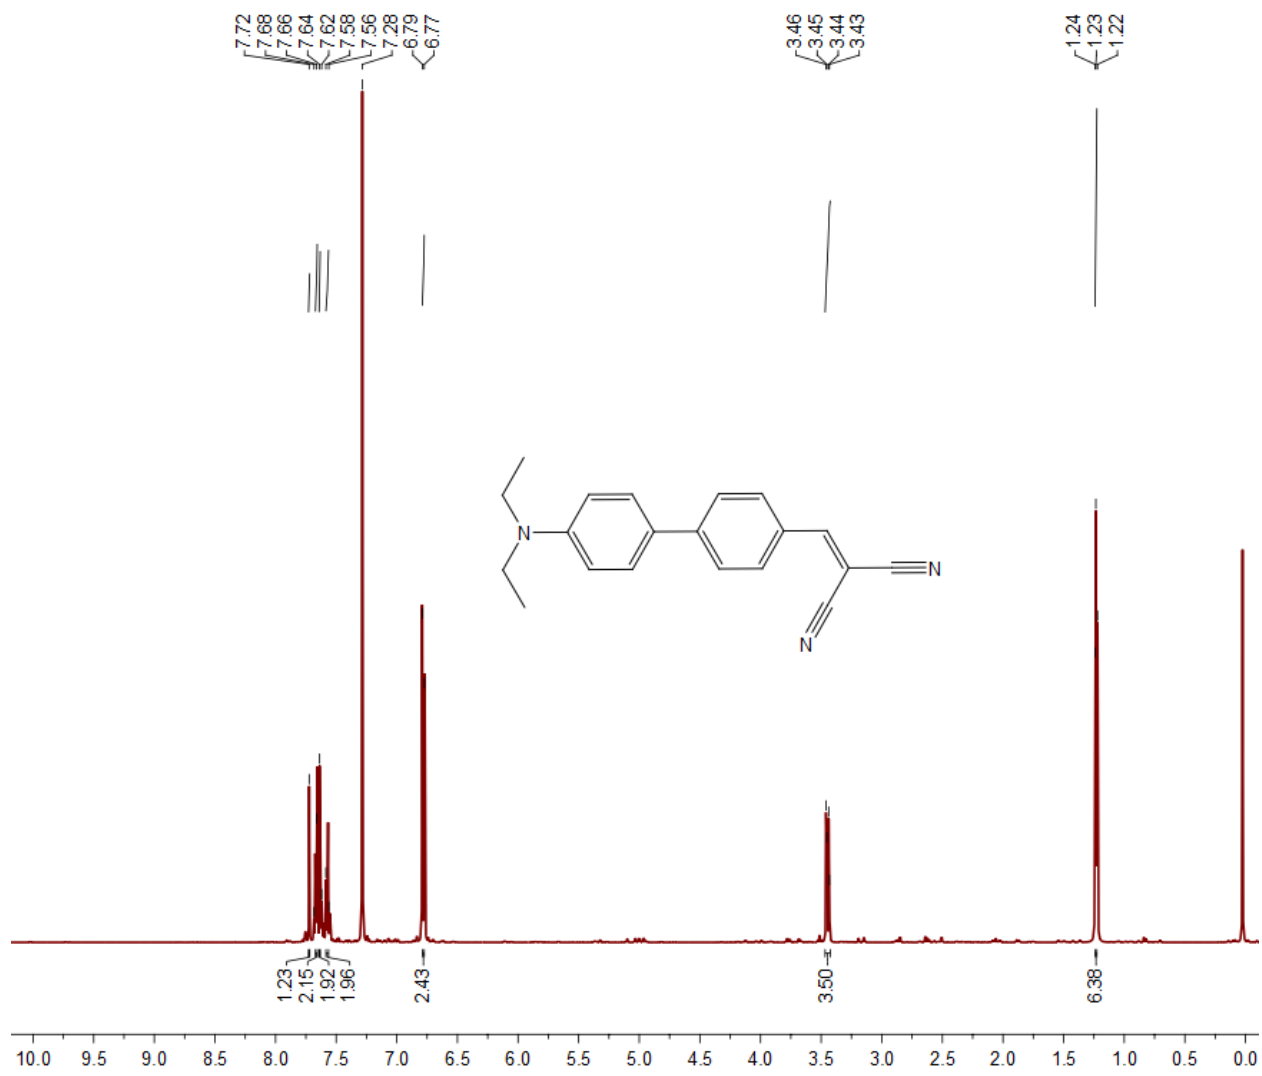

$^{13}\text{C}$  NMR spectrum of compound **6d** in  $\text{CDCl}_3$

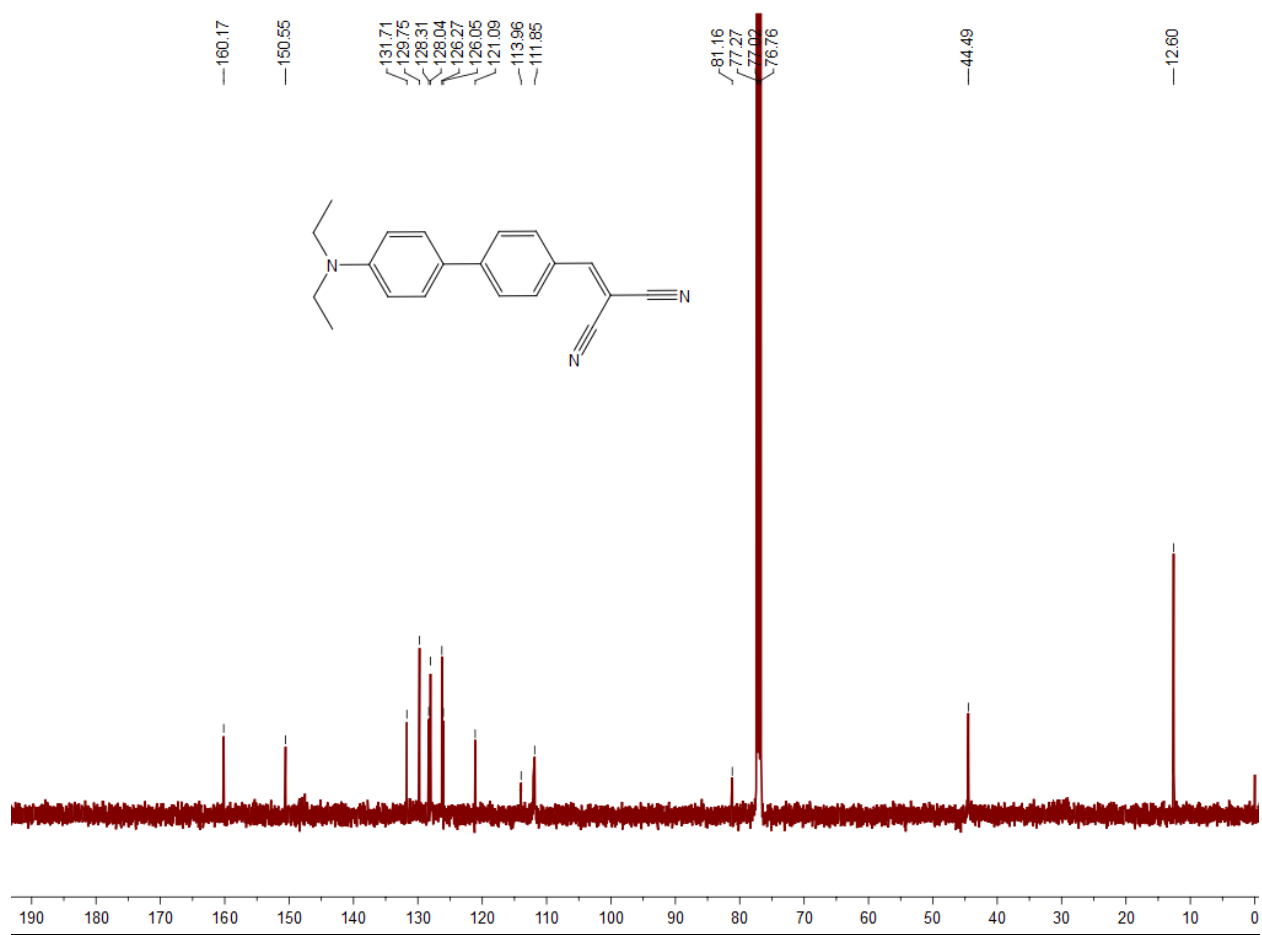



IV. UV-vis spectra of **6a-6d** as thin film

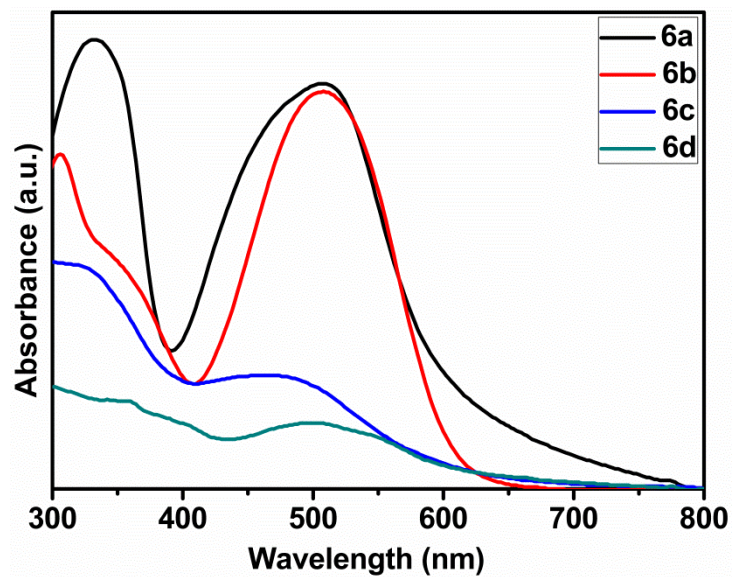

**Fig. S1** Thin film UV-vis spectra of **6a-6d** recorded in quartz plate

V. UV-vis spectra of **6a-6d** in different solvents

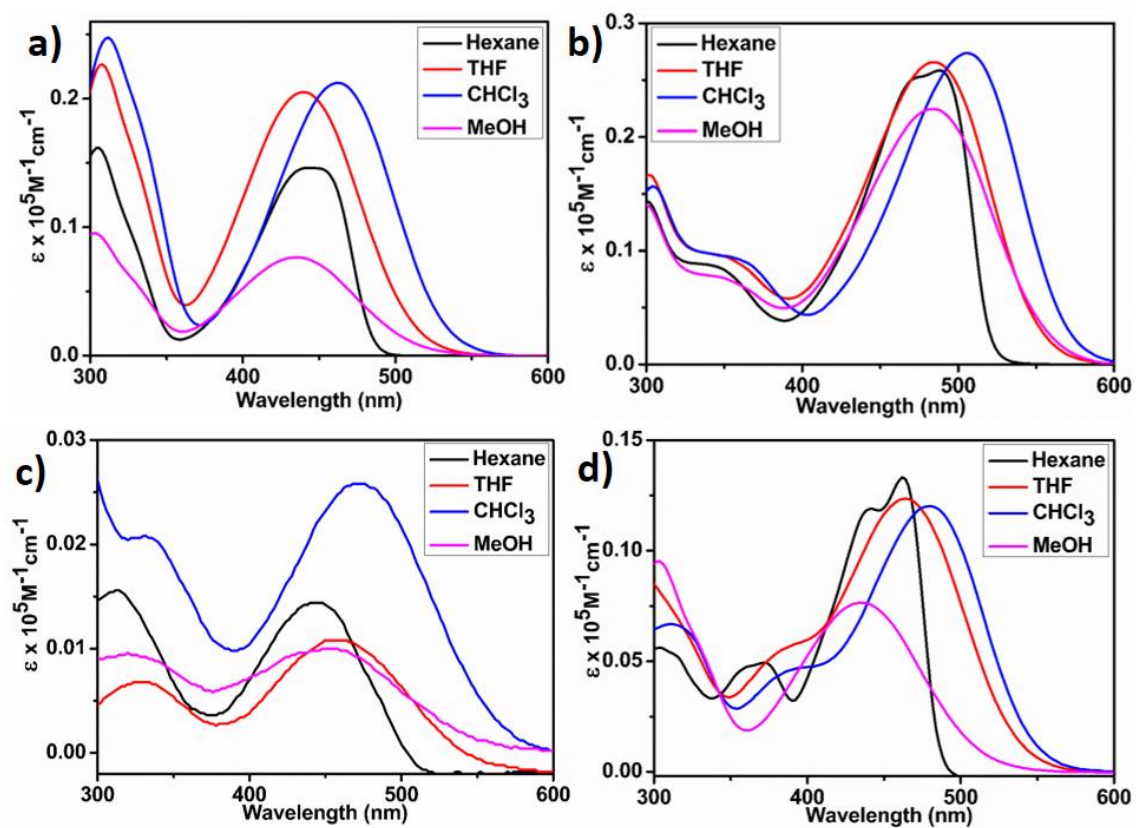

Fig. S2 UV-vis spectra of compound **6a-6d** recorded in different solvents ( $5 \times 10^{-5}$  M)

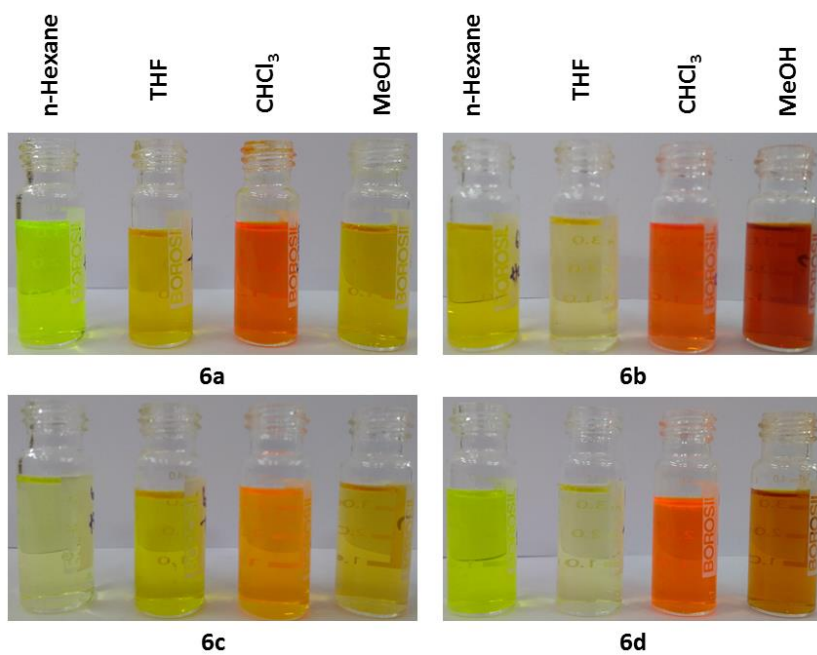

**Fig. S3** Solvatochromic behaviour of **6a-6d** in different solvents ( $5 \times 10^{-5}$  M)

## VI. Photoluminescence spectra of **6a-6d**

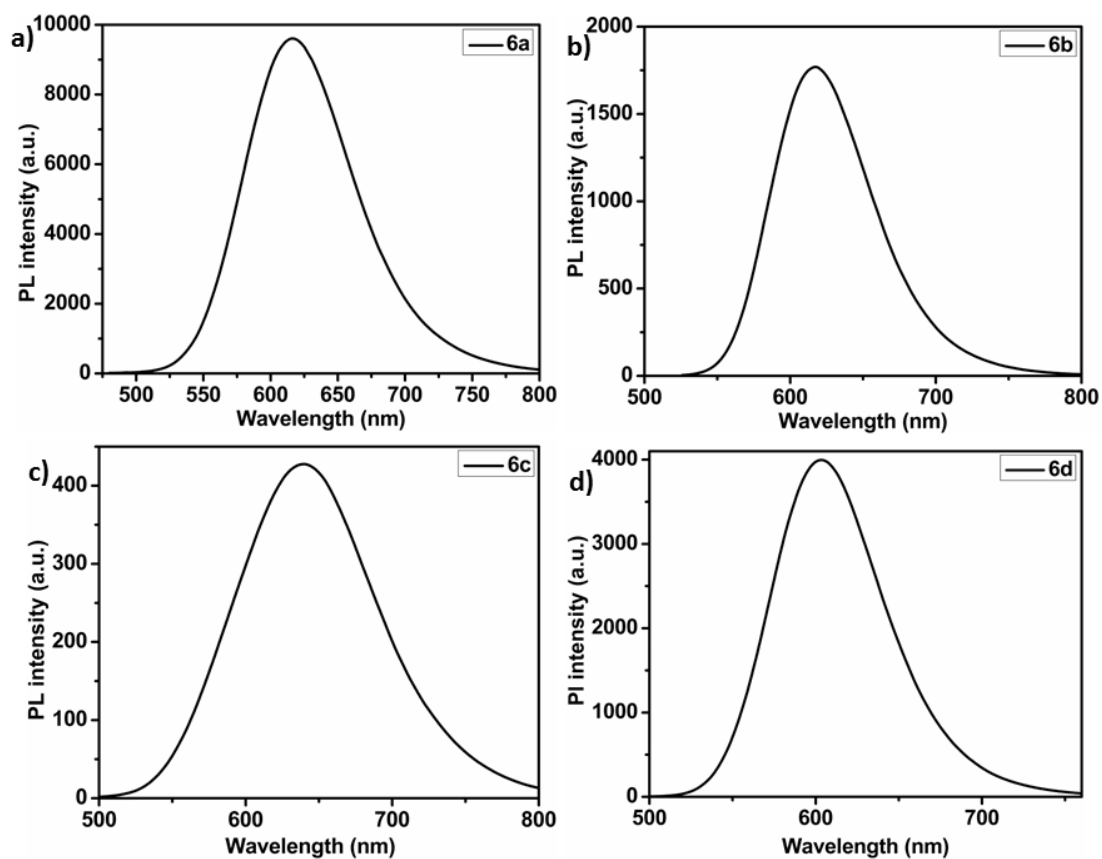

**Fig S4** Photoluminescence of **6a-6d** in  $\text{CHCl}_3$  (**6a** in  $5 \times 10^{-6}$  M and **6b-6d** in  $5 \times 10^{-5}$  M)

**Table S1** Photoluminescence data of **6a-6d**

| <b>6a-6d</b> | $\lambda_{\text{em}}$ (nm) | Stokes shift ( $\text{cm}^{-1}$ ) |
|--------------|----------------------------|-----------------------------------|
| <b>6a</b>    | 616                        | 64900                             |
| <b>6b</b>    | 622                        | 89300                             |
| <b>6c</b>    | 667                        | 60200                             |
| <b>6d</b>    | 623                        | 80000                             |

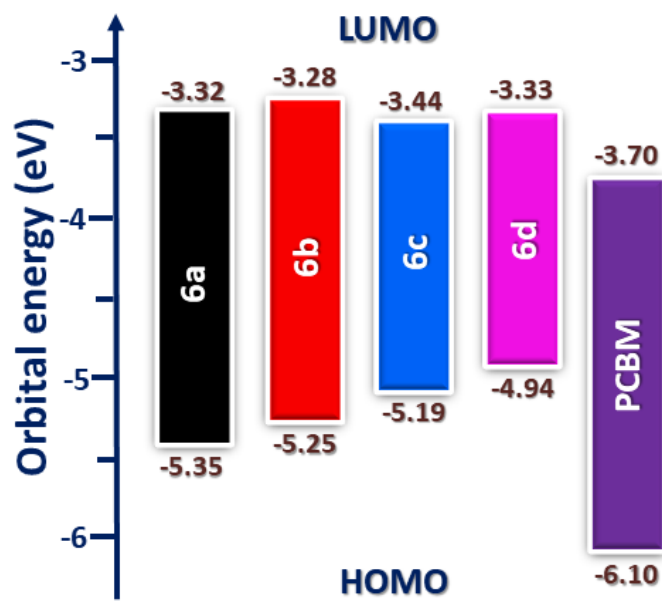

**Fig S5** Energy band diagram of **6a-6d** against standard n-type material (PCBM)
